## PHYLOGENETIC ANALYSIS OF THE FAMILY AMPITHOIDAE STEBBING, 1899 (CRUSTACEA: AMPHIPODA), WITH A SYNOPSIS OF THE GENERA

Rachael A. Peart<sup>1,\*</sup> and Shane T. Ah Yong<sup>2,3</sup>

<sup>1</sup> University of New England, Armidale, NSW 2351, Australia

<sup>2</sup> Australian Museum, Sydney, NSW 2010, Australia

<sup>3</sup> School of Biological, Earth and Environmental Sciences, University of New South Wales, Kensington, NSW 2052, Australia

### ABSTRACT

The Ampithoidae is a speciose family of mostly herbivorous amphipods. Although these amphipods feature heavily in shallow-water community and other ecological studies, their phylogenetic relationships have been little studied. We examined the phylogenetic relationships within Ampithoidae to test the subfamilial and generic classification. Cladistic analysis of 77 morphological characters across 53 terminal taxa representing all recognised genera resulted in five most parsimonious trees, differing only in internal relationships of species of *Perampithoe* Conlan and Bousfield, 1982. The subfamilies Amphitholininae Conlan, 1982, and Exampithoinae Myers and Lowry, 2003, are not recognised. Most genera are recovered as monophyletic, but *Cymadusa* Savigny, 1816, and *Ampithoe* Leach, 1814, are paraphyletic. *Pleonexes* Spence Bate, 1857 is recognised as a valid genus and removed from the synonymy of *Ampithoe*. *Melanesius* Ledoyer, 1984, is synonymised with *Exampithoe* K. H. Barnard, 1925, and *Perampithoe* is synonymised with *Sunampithoe* Spence Bate, 1857. A revised generic classification of Ampithoidae is presented, including a key to the 15 valid genera and revised diagnoses for each genus.

KEY WORDS: cladistics, phylogeny, taxonomy

DOI: 10.1163/1937240X-00002449

### INTRODUCTION

Amphipods of the family Ampithoidae Stebbing, 1899, constitute a group of herbivorous, algal and seagrass dwellers, common throughout tropical and temperate waters worldwide. The family is the largest family of herbivorous amphipods in terms of number of species, and their ecological importance has stimulated numerous studies examining plant-herbivore interactions, including host impacts (Duffy, 1990; Chess, 1993), dietary preferences (e.g., Duffy and Hay, 1991; Poore and Steinberg, 1999; Cruz-Rivera and Hay, 2001), distributional correlates (Edgar, 1983; Taylor, 1998), responses to secondary metabolites (e.g., Hay et al., 1987), susceptibility to predation (e.g., Hay et al., 1990; Holmlund et al., 1990), and taxonomic and geographic correlates of host use (Poore et al., 2008).

The taxonomy of Ampithoidae has been extensively studied in recent years (e.g., Poore and Lowry, 1997; Peart, 2004, 2007a, b, 2014; Kim et al., 2012), but conflicting subfamilial systems have been proposed. In addition to the nominate subfamily, Conlan (1982) proposed Amphitholininae for *Amphitholina* Ruffo, 1953, whereas Myers and Lowry (2003) proposed Exampithoinae for *Exampithoe* K. H. Barnard, 1925, and *Melanesius* Ledoyer, 1984. At present 206 species are recognised, but there has been considerable flux in the number of recognised genera. *Paradusa* Ruffo, 1969, has been considered to be a synonym of *Cy-*

*madusa* Savigny, 1816 (Poore and Lowry, 1997) or as a separate valid genus (Ruffo, 1969; J. L. Barnard and Karaman, 1991). Similarly, *Pleonexes* Spence Bate, 1857, has been usually regarded as a synonym of *Ampithoe* Leach, 1814 (J. L. Barnard, 1970; J. L. Barnard and Karaman, 1991; Peart, 2007b). Others, such as the two genera of the Exampithoinae Myers and Lowry, 2003, have been seen as subgenera (J. L. Barnard and Karaman, 1991; Poore and Lowry, 1997; Just, 2000), separate genera (K. H. Barnard, 1925; Ledoyer, 1984; Lowry and Myers, 2013) or as one genus (Conlan, 1982). The monophyly of larger genera such as *Ampithoe*, *Cymadusa*, and *Paragrubia* Chevreux, 1901, has also been questioned (J. L. Barnard and Karaman, 1991; Peart, 2007a, b; Hughes and Peart, 2013). Despite significant taxonomic attention, phylogenetic relationships among the amphithoids have received little attention. The current generic classification has its basis in the phenetic study of Conlan (1982), and to date, the phylogeny has not been tested by cladistic methods.

Ampithoids belong to a group of amphipods that have an entire and dorsoventrally thickened telson: the infraorder Corophiida Myers and Lowry, 2003. In their major revision of corophiideans, Myers and Lowry (2003) divided Ampithoidae into two subfamilies: Ampithoinae Leach, 1814, and Exampithoinae Myers and Lowry, 2003, largely on the basis of the entire rather than notched lower lip, which was believed to represent a plesiomorphic condition.

\* Corresponding author; e-mail: rachaelapeart@gmail.com

Most amphithoid species fall into three genera, *Ampithoe*, *Cymadusa*, and *Peramphithoe*, each of whose monophyly has been questioned. The remaining genera are either monotypic or contain only a few species. This study, therefore, reassesses the generic and subfamilial classification using phylogenetic analysis and provides a revised synopsis of the genera of Amphithoidea.

## MATERIALS AND METHODS

### Terminal Taxa

All currently recognised amphithoid genera were represented by one or more exemplars, minimally including the type species of currently recognised genera (and synonyms if present). For species-rich genera (e.g. *Ampithoe* and *Cymadusa*), multiple exemplars were chosen to represent the morphological diversity within each of these genera and allow testing of their monophyly. Morphological scorings were derived from examination of specimens, supplemented by published accounts. Specimens examined are deposited in the collections of the Australian Museum, Sydney (AM), Museo Civico di Storia Naturale, Verona, Italy (MVR), Museum Victoria, Melbourne (NMV), South African Museum, Capetown (SAMC), South Australian Museum, Adelaide (SAMA), and Western Australian Museum, Perth (WAM). Terminal taxa are listed in Appendix A.

### Outgroup Selection

Identification of the sister group to Amphithoidea has been hampered by the paucity of large-scale phylogenetic analyses of Amphipoda. J. L. Barnard and Karaman (1991) noted Amphithoidea to be part of the larger group of corophioids, being possibly closely related to Ischyroceridae. Berge et al. (2000) found Amphithoidea to be closely related to Calliopeidae, but the most recent and most comprehensive analysis of the corophiidean amphipods identified Amphithoidea to be sister to Corophiidae, within which Protomeiinae is basal (Myers and Lowry, 2003). Therefore, two species of *Protomeidea* Krøyer, 1842 (*P. articulata* J. L. Barnard, 1962 and *P. crudoliops* Hirayama, 1984) were selected as outgroups.

### Analytical Methods

Characters and taxa were scored into an open DELTA (Dallwitz, 2005) database and exported as a nexus file for phylogenetic analysis. The final data matrix included 53 terminals (including 2 outgroups) and 77 characters (Appendix B). All characters were unordered, so the scoring for each state (i.e. 1, 2 etc.) implies nothing about the polarity or order. Polymorphisms were scored as such rather than assuming a plesiomorphic state. All characters were equally weighted and inapplicable data were scored as unknown.

Trees were generated using PAUP\* 4.0b10 (Swofford, 2002) under a heuristic search (MULPARS, tree-bisection-reconnection, 500 replicates with random addition sequence). The relative stability of the clades was assessed by jackknifing implemented in PAUP\* using 1000 pseudoreplicates and 30% character deletion. Pseudoreplicate bias during jackknifing was reduced by using a tree-space-search of 10 random addition sequence iterations with a maximum of 10 trees saved per iteration. Character state changes were studied in Mesquite Version 3.04 (Maddison and Maddison, 2015).

### Character Analysis

**Head.—Mouthparts bundle.** The mouthparts form a bundle on the ventral margin of the head, and its particular conformation and orientation often correlates with the feeding strategies of the amphipod (Watling, 1993). Just (2002) demonstrated this to be reliable character defining *Pseudopleonexes* Conlan, 1982, in which the mouthparts bundle is directed posteriorly at an angle of approximately 45°. In *Amphitholina* Ruffo, 1953, which burrows into the stipes of large kelps, the mouthpart bundle is directed forwards (Myers, 1974). In all other genera the epistome and upper lip are directed approximately straight down, perpendicular to the ventral margin of the head.

Character 1. Epistome and upper lip angle: directed straight down, approximately 90° (1); directed posteriorly at more than 45° (2); directed anteriorly at approximately 45° (3).

**Antennae.** The length and structure of the antennae, whether antenna 1 is longer than, as long as, or shorter than antenna 2 usually differs between

genera. The robustness of the antennae relative to each other also seems to be different between the genera. The relative lengths of the antennae appear to be more consistent between the genera than the robustness, which can sometimes be sexually dimorphic.

The presence or absence of an accessory flagellum is diagnostic among families and genera in many groups of amphipods (J. L. Barnard and Karaman, 1991). The condition of the accessory flagellum is variable among amphithoids. It can be absent (e.g., *Ampithoe*), present as a very small scale-like article (e.g., *Paradusa*), have one elongated article or one elongated and one reduced article (e.g., *Cymadusa*), or have three or more well developed articles, but usually no more than 10 articles (*Paragrubia*).

Conlan (1982) identified two additional antenna 2 characters. These relate to the fusion of flagellum articles and the indentation of the head at the insertion of antenna 2. These characters were not used in the present analysis because they are known in too few taxa. Moreover, these characters appear to have little systematic value based on the species examined.

Character 2. Antenna 1 length relative to antenna 2: shorter than (1); longer than (2), subequal to (3).

Character 3. Antenna 1 accessory flagellum: present (1); absent (2).

Character 4. Antenna 1 accessory flagellum development: absent (1); 1-segmented (2); 2-segmented (3); 3-5-segmented (4); 6-segmented or more (5).

Character 5. Antenna 2: slender, similar to antenna 1 (1); robust, better developed than antenna 1 (2).

Character 6. Antenna 2 ventral setation: long, dense, plumose setae (1); short dense setae (2); minimal setation (3).

**Mandible.** The molar process and mandibular palp vary in their development, being reduced in some genera. The palp varies in the number of articles and has traditionally been used to separate genera. For example, in *Sunamphithoe* the palp may be absent or 1-articulate, the single distinguishing feature from *Peramphithoe*, in which the palp is 3-articulate. Similarly, in Exampithoinae, the singular difference between *Exampithoe* and *Melanesius* is the number of articles of the mandibular palp. Variability in the condition of the palp within the family and within a number of genera suggests that it may have limited value in generic diagnosis or that some genera as currently defined are not monophyletic. The shape of the third article of the palp has also been used to distinguish genera.

Character 7. Mandible molar process: well developed, triturating (1); reduced (2); absent (3).

Character 8. Mandibular palp development: 3-articulate (1); 2-articulate (2); 1-articulate (3); absent (4).

Character 9. Mandibular palp shape: slender (1), stout (2).

Character 10. Mandibular palp article 3: smooth or rounded distally (1), beak-like, extended to form a point (2).

**Lower lip.** A diagnostic character of Amphithoidea is a notch in the outer plate of the lower lip (Fig. 1). This varies nevertheless in its expression within in the family. The notch is relatively weak in *Pseudopleonexes* compared to other genera. In Exampithoinae, however, the margin of the outer plate of the lower lip is entire, providing one of the justifications for its putatively basal subfamily status according to Myers and Lowry (2003).

Character 11. Lower lip, outer plate: entire (1), notched (2) (Fig. 1).

Character 12. Lower lip, outer plate, lobe lengths: entire (1), lobes lengths subequal (2), outer lobe longer than inner lobe (3) (Fig. 1).

**Maxilla 1.** The condition of the maxilla 1 palp has traditionally been considered as diagnostic for genera. The palp can be reduced (*Pseudoamphithoides* Ortiz, 1976) or absent (*Amphitholina* Ruffo, 1953). Conlan (1982) also emphasised the size of the palp relative to the outer plate. The apparent differences, however, appear to be an observational artefact resulting from different mounting techniques. Therefore, we regard this character as unreliable. The number of setae present on the inner plate

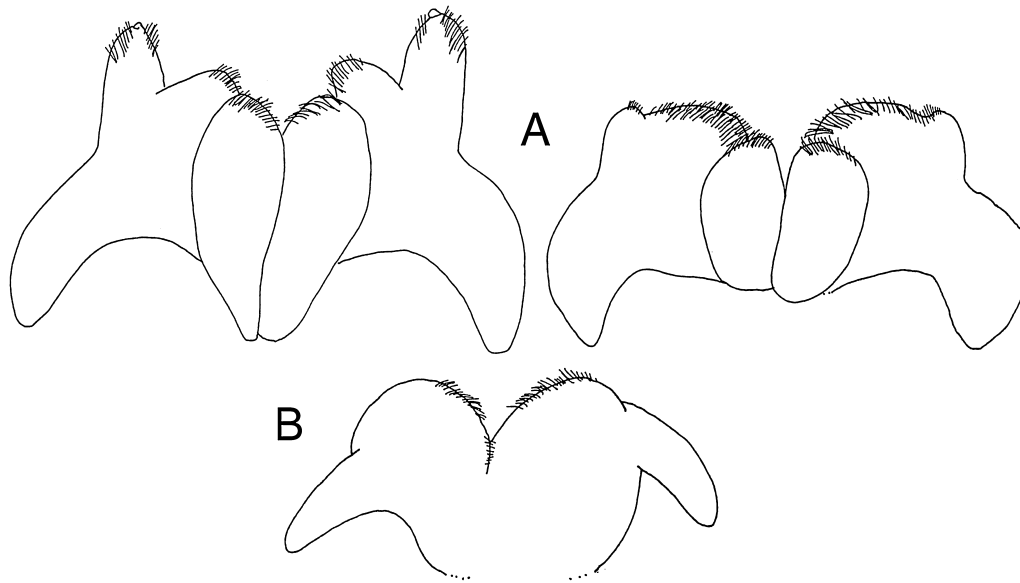

Fig. 1. Lower lip character progression. A, notched lower lip outer plate state (e.g., *Ampithoe* and *Pseudopleonexes*); B, entire lower lip state (e.g., *Exampithoe*).

of maxilla 1 has potential to be a useful taxonomic character, but is not presently known across enough taxa.

Character 13. Maxilla 1 palp size: well developed (1); reduced (2); absent (3).

*Maxilla 2.* The relative widths of the plates of the maxilla 2 have been traditionally used to separate genera (Conlan, 1982).

Character 14. Maxilla 2: plates similar width (1); outer plate broader than inner (2).

*Pereopodal coxae.* Species of *Exampithoe* have short coxae (as long as wide to wider than long), whereas those of most other genera have long coxae (longer than wide).

Character 15. Coxae: short (1); long (longer than wide) (2).

*Gnathopods 1 and 2.* Most amphithoid genera are strongly sexually dimorphic and most diagnostic characters at a species level only vary in the males. Characters associated with gnathopods 1 and 2 are diagnostic for both species and genera. The sculpturing and shape of the propodus of gnathopod 2 especially is useful for species identification. The sexual dimorphism of the gnathopods (especially the second pair) of amphithoids has traditionally been used to distinguish genera.

Character 16. Gnathopod 1 size: larger than gnathopod 2 (1); subequal in size to gnathopod 2 (2); smaller than gnathopod 2 (3).

Character 17. Gnathopod 1 size: robust (1); slender (2).

Character 18. Gnathopod 1 coxa: produced distoventrally (1); not produced distoventrally (2).

Character 19. Gnathopod 1 basis, anterodistal lobe: large and rounded (1); large and subacute (2); absent (3); small and rounded (4); reduced (5).

Character 20. Gnathopod 1 ischium anterodistal lobe: absent (1); present (2).

Character 21. Gnathopod 1 merus lobe: long (1); short (2); absent (3).

Character 22. Gnathopod 1 carpus length to propodus: markedly shorter than propodus (1); slightly shorter than propodus (2); subequal to propodus (3); slightly longer than propodus (4); markedly longer than propodus (5).

Character 23. Gnathopod carpal lobe shape: lobe with straight edge (1); rounded (2); acute (3); subacute (4); absent (5).

Character 24. Gnathopod 1 carpus anterior margin setation: absent (1); 1 robust seta (2); 2 robust setae (3); 3 robust setae (4); 4 or more robust setae (5); slender setae only (6).

Character 25. Gnathopod 1 propodal palm angle: acute (1); transverse or nearly so (2); undefined (3); obtuse (4).

Character 26. Gnathopod 1 propodal palm posterodistal tooth: present (1); absent (2).

Character 27. Gnathopod 1 propodal palm defining robust setae: absent (1); one (2); two (3); three or more (4).

Character 28. Gnathopod 1 dactylus length to palm: shorter than palm (1); subequal to palm (2); overreaching palm (3).

Character 29. Gnathopod 2 form: robust (1); slender (2).

Character 30. Gnathopod 2 basis, anterodistal lobe: prominent, blunt (1); large, narrowed, subacute (2); absent (3); small and rounded (4); reduced (5).

Character 31. Gnathopod 2 ischium anterodistal lobe: absent (1); present (2).

Character 32. Gnathopod 2 merus lobe: long (1); short (2); absent (3).

Character 33. Gnathopod 2 carpal lobe: absent (1); present (2).

Character 34. Gnathopod 2 carpus anterior margin setation: absent (1); 1 robust seta (2); 2 robust setae (3); 3 robust setae (4); 4 or more robust setae (5); slender setae only (6).

Character 35. Gnathopod 2 carpus length to propodus: much shorter than propodus (1); slightly shorter than propodus (2); subequal to propodus (3); longer than propodus (4); much longer than propodus (5).

Character 36. Gnathopod 2 propodal palm angle: transverse or nearly so (1); acute (2); extremely angled, almost in line with posterior margin (3); obtuse (4).

Character 37. Gnathopod 2 propodal palm sculpturing: absent (1); present (2).

Character 38. Gnathopod 2 dactylus length to palm: shorter than palm (1); subequal to palm (2); overreaching palm (3).

*Pereopods 3 and 4.* Pereopods 3 and 4 are morphologically similar in Amphithoidae. The most important features are the degree of expansion of the basis and the anterior expansion (or its absence) of the merus. This expansion of basis and merus stems from the presence of mucous glands and is most pronounced in specialist nest builders such as the *Pseudoamphithoides*, *Peramphithoe*, *Sunamphithoe*, and *Pseudopleonexes*. The species of these genera tend to construct nests from seaweed or detritus using the mucus as an adhesive to bind together fragments. The mucus is sometimes strong enough to hold blades of the seaweed that are still attached to the plant and also to curl the blades to form a tube. Less host-specific species tend to have a reduced gland and narrow, non-expanded bases and meri on pereopods 3 and 4.

Character 39. Pereopod 3 basis: expanded (1); narrow (2).

Character 40. Pereopod 3 merus: anteriorly expanded (1); narrow (2).

*Pereopods 5-7.* Pereopods 5-7 show varying degrees of prehensility in amphithoids. Vader (1983) summarised discussions on the value of

prehensile appendages as diagnostic characters. The variety and functional morphology of prehensile pereopods is a complex issue. Several forms of prehensile pereopods are recognized in Amphithoidea. Pereopods 5-7 are either simple, weakly prehensile, strongly prehensile, or nearly subchelate. The expansion of the distal articles of pereopods 5-7 is an important feature in some groups. *Macropisthopous* K. H. Barnard, 1916, has an expanded pereopod 7, but species of *Peramphithoe* and *Sunamphithoe* can also have this character on pereopods 5-7.

Character 41. Prehensibility of pereopods 5-7: simple (1); weak (2); strong (nearly subchelate) (3).

Character 42. Length of pereopod 5 to pereopods 6-7: P5-7 equal in length (1); P5 shorter than P6 and P7 (2).

Character 43. Pereopod 5 distal articles size: slender (1); broad (2); strongly broadened (3).

Character 44. Pereopod 5 propodus: slightly expanded distally (1); strongly expanded distally (2); not expanded distally (3).

Character 45. Pereopod 6 distal articles size: slender (1); broad (2); strongly broadened (3).

Character 46. Pereopod 6 propodus: subchelate, heel shaped (1); rectangular, not expanded proximally (2).

Character 47. Pereopod 6 propodus: slightly expanded distally (1); strongly expanded distally (2); not expanded distally (3).

Character 48. Pereopod 7 distal articles size: slender (1); broad (2); strongly broadened (3).

Character 49. Pereopod 7 propodus: subchelate, heel shaped (1); rectangular, not expanded proximally (2).

*Epimeral plates.* The ornamentation of epimeron 3, and to some extent epimeron 2, is regarded as diagnostic for genera of the Amphithoidea. It is not sexually dimorphic and exhibits little allometric variation. Most members of *Cymadusa* and *Paragrubia* have a small, acute tooth on the posteroventral corner of epimeron 3.

Character 50. Epimeron 2 posteroventral corner: not produced (1); produced (2).

Character 51. Epimeron 3 posteroventral corner: broadly rounded (1); narrowly rounded (2); subquadrate (3); emarginate (4); acute (5).

*Uropods.* Uropods 1 and 2 are similar in shape. Several characters have diagnostic properties, notably the presence or absence of a distoventral spur on the peduncle of uropod 1. Three groups can be recognised based on the condition of the spur. The spur can be completely absent in both sexes; short and rounded on the peduncle of the male uropod 1 and absent from the peduncle of the female uropod 1; or long and acute on the peduncle of uropod 1. The presence or absence of a laterodistal projection on the peduncle of the male uropod 2, first recognised by Just (2002) is a synapomorphy of *Pseudopleonexes*. Another synapomorphy of *Pseudopleonexes* is the position of uropod 1 relative to uropod 2.

Uropod 3 carries a number of diagnostic characters. The outer ramus of uropod 3 bears two strongly recurved robust, apical setae, diagnostic for the Amphithoidea. Within the family, however, variation exists in the size and shape of these setae. The setation on the peduncle and both rami differs between genera.

Character 52. Uropod 1 in relation to uropod 2: short, reaching to the middle of the peduncle (1); subequal in length, reaching to the rami of uropod 2 (2); long, reaching past the rami of uropod 2 (3).

Character 53. Uropod 1 peduncle armature: unarmed (1); one or two robust setae (2); three to five robust setae (3); six or more robust setae (4).

Character 54. Uropod 1 peduncular setal fringe: absent (1); short (less than half the length of peduncle) (2); long (3).

Character 55. Uropod 1 peduncular distoventral spur in males: small and rounded (1); absent (2); large and acute (3).

Character 56. Uropod 1 inner ramus length: as long as outer (1); shorter than outer (2); longer than outer (3).

Character 57. Uropod 1 inner ramus number of marginal robust setae: absent (1); one or two (2); three to five (3); six or more (4).

Character 58. Uropod 1 outer ramus number of marginal robust setae: absent (1); one or two (2); three to five (3); six or more (4).

Character 59. Uropod 2 laterodistal peduncular projection: absent (1); present (2).

Character 60. Uropod 2 peduncle number of robust setae: absent (1); one or two (2); three to five (3); six or more (4).

Character 61. Uropod 2 peduncular setal fringe: absent (1); present (2).

Character 62. Uropod 2 inner ramus length: as long as outer (1); shorter than outer (2); longer than outer (3).

Character 63. Uropod 2 inner ramus number of marginal robust setae: absent (1); one or two (2); three to five (3); six or more (4).

Character 64. Uropod 2 outer ramus number of marginal robust setae: absent (1); one or two (2); three to five (3); six or more (4).

Character 65. Uropod 3 peduncle to rami length: short (1); long (2).

Character 66. Uropod 3 peduncle marginal robust setae: absent (1); one or two (2); three to five (3); six or more (4).

Character 67. Uropod 3 peduncle distal robust setae: absent (1); one or two (2); three to five (3); six or more (4).

Character 68. Uropod 3 rami width: broad (1); narrow (2).

Character 69. Uropod 3 outer ramus length to inner ramus: shorter than (1); subequal to (2); longer than (3).

Character 70. Uropod 3 outer ramus setation: 2 large recurved distal robust setae (1); 1 curved plus 1 small or straight robust seta (2); absent (3).

Character 71. Uropod 3 outer ramus lateral denticles: present (1); absent (2).

Character 72. Uropod 3 outer ramus lateral setal fringe: present (1); absent (2).

Character 73. Uropod 3 inner ramus distal robust setae: absent (1); one (2); two or three (3); four or more (4).

*Telson.* The telson bears diagnostic characters at all taxonomic levels. In amphithoids, the telson is subtriangular in dorsal outline except for the two species of *Austrothoe* Peart, 2014, which have a subrectangular telson bearing patches of conical denticles posterolaterally. Another character distinguishing some genera is the size or presence or absence of the apical cusps. In *Pseudopleonexes* and some species of *Pleonexes*, these cusps are enlarged to form large hooks. In other genera, the cusps are small or absent.

Character 74. Telson shape: subtriangular (1); subrectangular (2).

Character 75. Telson apical cusps: small (1); expanded into large hooks (2); absent (3).

Character 76. Telson setation: oblique rows (1); apical (2); lateral slender (3); absent (4); lateral robust (5).

Character 77. Telson denticles: absent (1); present (2).

## RESULTS

The heuristic search produced five most parsimonious trees of length 610 steps, consistency index (CI) 0.2323, and retention index (RI) 0.5675. Although nodal support is generally low, all trees are congruent except among five species of *Peramphithoe* that form a clade with *Sunamphithoe kanaka* (clade 44). Thus, results are effectively fully resolved. One of the five most parsimonious trees is shown in Fig. 2 with jackknife support and serves as the exemplar for character-state reconstructions. Unambiguous character state changes are listed in Appendix C and correspond to clade numbers marked in Fig. 2.

Monophyly of Amphithoidea is supported by 10 unambiguous changes (clade 1) of which the presence of two robust setae on the outer ramus of uropod 3 is never reversed (character 70). Other unambiguous changes supporting the ingroup node are either reversed or further derived high in the tree. *Amphithoides* Kossman, 1880, is sister to the remaining amphithoids followed by a monophyletic *Paragrubia* and paraphyletic *Cymadusa* and *Ampithoe*. The remaining amphithoid genera are recovered as monophyletic except for *Sunamphithoe* and *Peramphithoe*, whose species are intermingled within a single clade, and *Melanesius*, which is paraphyletic as a result of an internally nested *Exampithoe*. Like *Peramphithoe* and *Sunamphithoe*, the species of *Exampithoe* and *Melanesius* together form a clade, but neither genus is monophyletic. Moreover, the *Exampithoe* + *Melanesius* clade, comprising Myers and Lowry's (2003)

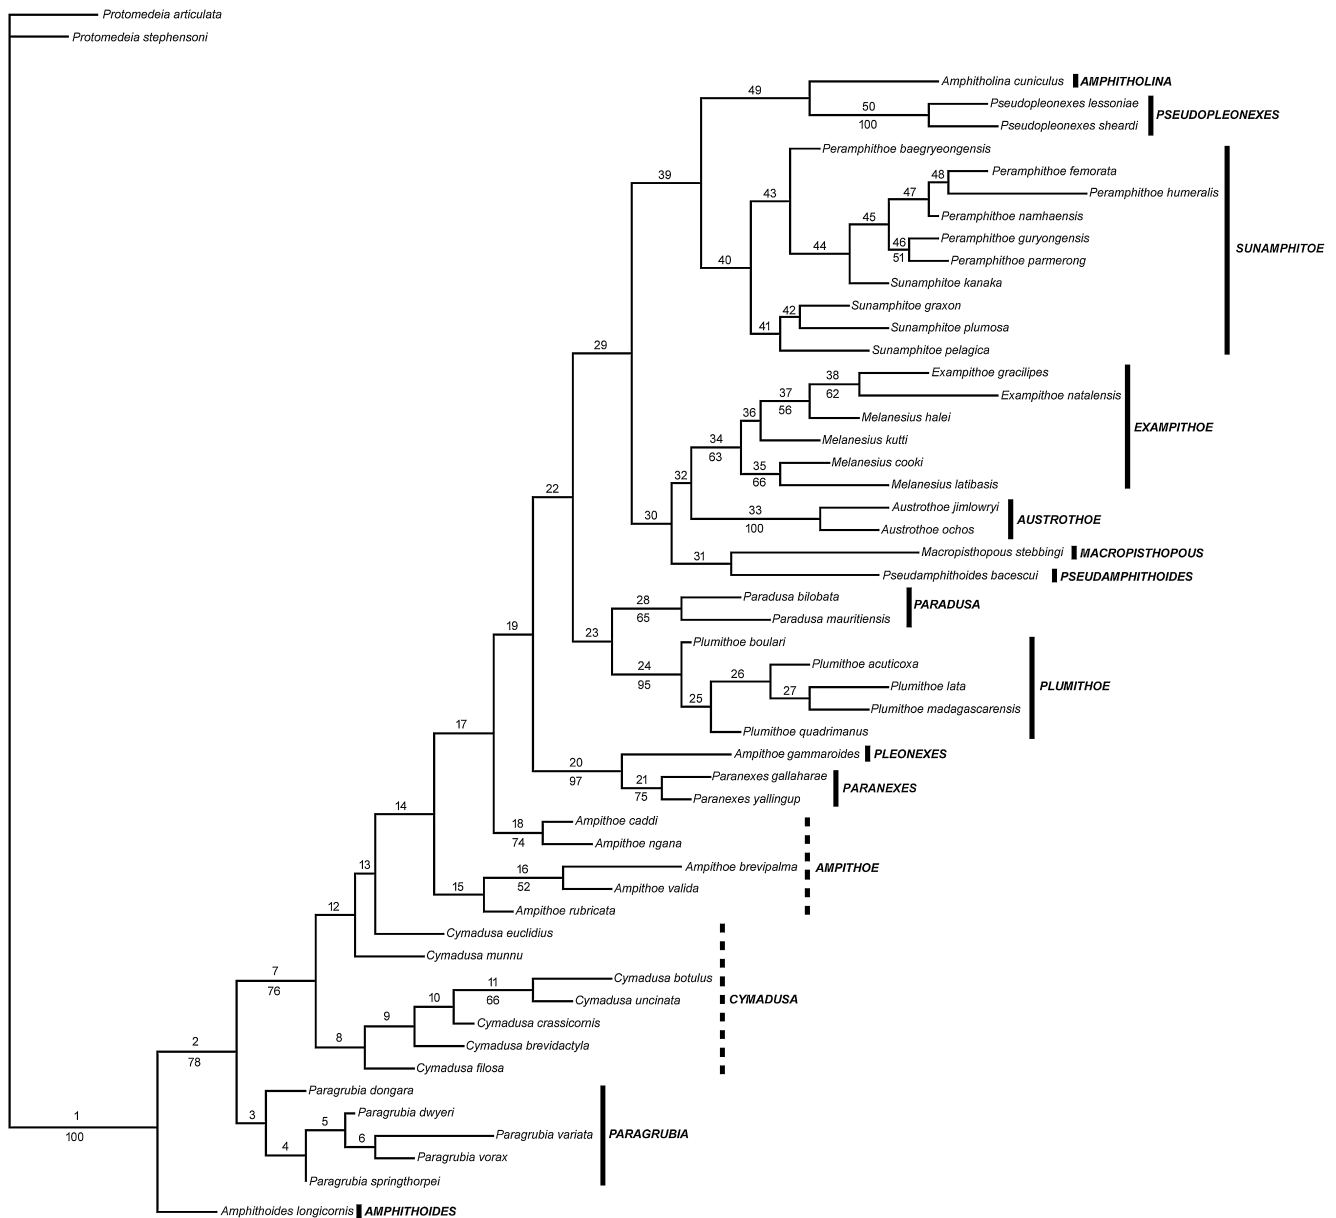

Fig. 2. One of the five most parsimonious trees (length 610 steps, consistency index 0.2323, retention index 0.5675). Clade number indicated above branch, corresponding to character state reconstructions listed in Appendix C. Jackknife support indicated below branch.

Exampithoinae, is deeply nested among the remaining amphithoid genera.

Of the three largest amphithoid genera (*Ampithoe*, *Cymadusa* and *Paragrubia*), only *Paragrubia* is recovered as monophyletic. *Ampithoe* and *Cymadusa* form a paraphyletic series between *Paradusa* and the remaining amphithoid genera higher in the tree. Species of *Ampithoe* are grouped into three separate clades of which one includes the type species of the genus, and another corresponds to the previously synonymised genus, *Pleonexes*. The majority of *Cymadusa* exemplars, however, group with the type species of the genus, *C. filosa*.

*Paradusa*, *Plumithoe*, *Paranexes* + *Pleonexes* are in clearly defined clades. The monotypic or very small genera of *Macropisthopous*, *Pseudamphithoideos*, *Amphitholina* and

*Pseudopleonexes* are strongly defined and not nested within other groups of species.

## DISCUSSION

Not surprisingly, our cladistic results differ significantly from those of Conlan's (1982) phenetic analysis. Whereas Conlan (1982) interpreted *Amphitholina* as basal in the family and justifying subfamilial status (Amphitholininae), present results indicate that *Ampithoidea* is sister to the remaining amphithoids with *Amphitholina* occupying a 'high' position in the tree. As such, Amphitholininae cannot be maintained. Our results, however, corroborate Conlan's (1982), contention of a phylogenetic trend in the palmar angle of gnathopod 1 from oblique to transverse.

J. L. Barnard (1970) noted in his discussion of Hawaiian biodiversity and amphipod morphology that changes in morphology such as loss of mandibular palp articles and reversal of dominance in gnathopods have lower value in diagnosing genera than previously thought. This seems evident throughout the amphithoid genera as well, in which much emphasis has previously been placed on the condition of the mandibular palp and the size of the male gnathopods.

Amphithoidae has usually been defined by two main characters, namely the notched outer plate of the lower lip and the presence of distal recurved robust setae on the outer ramus of the third uropod. The condition of the lower lip (whether notched or entire) is of particular significance in amphithoid taxonomy as a primary feature driving the subfamilial classification: entire in Exampithoinae, notched in Amphithoinae (Myers and Lowry, 2003). Although the entire lower lip unites the two nominal exampithoine genera, *Exampithoe* and *Melanesius*, our results show they form a clade deeply nested among the amphithoine genera as sister to *Austrothoe*. Recognition of Exampithoinae would render Amphithoinae paraphyletic. Therefore, we do not recognise the validity of Exampithoinae and as such abandon the subfamilial classification. The entire lower lip shared by *Exampithoe* and *Melanesius* is a synapomorphy derived from the notched condition of all other amphithoids. Although species of *Exampithoe* and *Melanesius* form a single clade, the former is paraphyletic with respect to the latter. The single feature distinguishing *Exampithoe* and *Melanesius* is the presence or absence of the mandibular palp. Our results, however, show that the condition of the palp does not support two reciprocally monophyletic clades corresponding to *Exampithoe* and *Melanesius*, but that the latter is nested within the former. We therefore synonymise the two nominal genera and recognise only *Exampithoe*.

*Paradusa* is sister to *Plumithoe*. The status of *Paradusa* and whether it is a synonym of *Cymadusa* has been controversial (Poore and Lowry, 1997). Present results, however, suggest that these taxa are not closely related and thus should be maintained as separate genera.

Although present results suggest that *Cymadusa* is not monophyletic, it would be premature to further divide the genus until more extensive phylogenetic analyses can be undertaken to identify natural groupings that could form separate genera. *Cymadusa* presently includes two genera in its synonymy (*Grubia* and *Acanthogrubia*) both of whose respective type species (*Grubia taurica* Czerniavsky, 1868 = *C. crassicornis* Costa, 1853; *Acanthogrubia uncinata* Stout, 1912) align with the type species of *Cymadusa*, meaning any future division of *Cymadusa* will likely result in new genera. At present, we recognise *Cymadusa* as paraphyletic, requiring further phylogenetic study.

*Ampithoe* is a difficult genus to assess. Consisting of 72 worldwide species, significant morphological diversity occurs within the group and many of its constituent species remain to be revised. Like *Cymadusa*, most junior generic synonyms of *Ampithoe* align with *A. rubricata* (type species of the genus), so future divisions of the genus will likely result in new genera, rather than resurrection of older names. One clade, however, corresponds to *Pleonexes*, which J. L. Barnard (1970) synonymised with *Ampithoe*. Our results

show that the clade containing the type species of *Ampithoe* (clade 15) is phylogenetically distant from that of *Pleonexes* indicating that both genera should be recognised. We refrain from further subdivision of *Ampithoe* until more detailed analyses of its composition can be conducted. It remains possible that some poorly known species of *Ampithoe*, when revised, will prove to be better placed in *Pleonexes* than *Ampithoe*.

The status of *Macropisthopous* K. H. Barnard, 1916, has been a source of controversy (Poore and Lowry, 1997). In erecting *Macropisthopous*, Barnard (1916) provided an inadequate description and figures, particularly with respect to the presence or absence of a spur on the peduncle of uropod 1, important for distinguishing *Sunamphitoe* and *Peramphitoe*. This led to the confusion over whether *Macropisthopous* represented a derived *Sunamphitoe* or *Peramphitoe* or was actually a separate valid genus. Examination of the type material (holotype and slide: SAM 18971, Cat. No. A2917, A3287, A3035) of *M. stebbingi* K. H. Barnard, 1916, indicates that the spur on the peduncle of uropod 1 is absent, distinguishing *Macropisthopous* from *Sunamphitoe*. Moreover, present results find *Macropisthopous* to be more closely related to *Pseudoamphithoides*, *Exampithoe* and *Austrothoe* than *Sunamphitoe*. *Macropisthopous* is thus recognised here as a valid genus.

The status of *Peramphitoe* and *Sunamphitoe* requires reconsideration given present results. Although exemplars of both *Peramphitoe* and *Sunamphitoe* are united within the same clade, they do not form reciprocally monophyletic units corresponding to their assigned genera. The two putative genera are distinguished by the presence or absence of the mandibular palp. The mandibular palp, however, is lost independently multiple times in not only *Peramphitoe* and *Sunamphitoe*, but also throughout the genera of Amphithoidae, indicating that it has little value in tracing phylogenetic relationships at generic level. Aside from the condition of the mandibular palp, *Peramphitoe* and *Sunamphitoe* are indistinguishable. Given that the species of *Peramphitoe* and *Sunamphitoe* are nested together, we herein synonymise *Peramphitoe* with *Sunamphitoe*.

Based on the results of cladistic analysis, we herein recognise 15 genera as valid. *Peramphitoe* is synonymised with *Sunamphitoe*, *Melanesius* is synonymised with *Exampithoe* and Exampithoinae is abandoned. *Pleonexes* is removed from the synonymy of *Ampithoe* and recognised as a valid genus most closely related to *Paranexes*. Although *Cymadusa* and *Ampithoe* are not monophyletic, we defer revising their compositions until more detailed analyses can be completed. The revised generic classification of Amphithoidae is presented below including diagnoses and composition of the genera, and a key to the genera.

## SYSTEMATICS

Order Amphipoda Latreille, 1816  
Suborder Senticaudata Lowry and Myers, 2013  
Superfamily Corophioidea Leach, 1814  
Family Amphithoidae Stebbing, 1899

Diagnosis.—Lower lip notched (sometimes entire). Maxilla 1 outer plate—broad (occasionally narrowed). Coxae long

(sometimes reduced in length). Uropod 3 outer ramus with distal, strongly recurved robust setae or weakly recurved or straight distal robust setae. Telson with cusps.

#### Key to the Genera of Amphithoidae

1. Uropod 1 (male) peduncular distoventral spur reduced or absent. . . . . 2
  - Uropod 1 (male) peduncular distoventral spur large and acute . . . . . 10
2. Coxae 1-4 shorter than wide or as wide as long . . . . . 3
  - Coxae 1-4 longer than wide . . . . . 5
3. Telson triangular, denticles absent. Pereopods 6-7 propodus subrectangular. . . . . 4
  - Telson rectangular, denticles present. Pereopods 6-7 propodus produced proximally to form a heel. . . . . *Austrothoe* Peart, 2014
4. Lower lip outer plate entire. Maxilla 1 palp well developed. Gnathopod 1 palm acute . . . . . *Exampithoe* K. H. Barnard, 1925
  - Lower lip outer plate notched. Maxilla 1 palp reduced. Gnathopod 1 palm transverse . . . . . *Pseudoamphithoides* Ortiz, 1976
5. Uropod 2 (male) peduncle with broad rounded laterodistal projection. . . . . *Pseudopleonexes* Conlan, 1982
  - Uropod 2 (male) peduncle without laterodistal projection . . . . . 6
6. Telsonic cusps reduced . . . . . 7
  - Telsonic cusps expanded to form large hooks . . . . . 8
7. Gnathopod 1 palm acute . . . . . *Ampithoe* Leach, 1814
  - Gnathopod 1 palm transverse . . . . . *Macropisthopous* K. H. Barnard, 1916
8. Mandibular molar and palp absent, maxilla 1 palp absent . . . . . *Amphitholina* Ruffo, 1953
  - Mandibular molar and palp present, maxilla 1 palp present . . . . . 9
9. Uropod 1 peduncular distoventral spur (male) absent . . . . . *Paranexes* Peart, 2014
  - Uropod 1 peduncular distoventral spur (male) rounded and reduced . . . . . *Pleonexes* Spence Bate, 1857
10. Antenna 1 accessory flagellum present. . . . . 11
  - Accessory flagellum absent. . . . . 14
11. Accessory flagellum with 1-2 articles. . . . . 12
  - Accessory flagellum with 3 or more articles . . . . . *Paragrubia* Chevreux, 1901
12. Uropod 3 rami narrow; outer ramus with reduced distal robust setae. . . . . *Amphithoides* Kossmann, 1880
  - Uropod 3 rami broad; outer ramus with strongly recurved distal robust setae. . . . . 13
13. Mandibular palp stout. Maxilla 2 outer plate much broader than inner plate . . . . . *Cymadusa* Savigny, 1816
  - Mandibular palp slender. Maxilla 2 outer plate equal width to inner plate . . . . . *Paradusa* Ruffo, 1969
14. Pereopods 3 and 4 bases and meri narrow, antenna 2 with long, dense plumose setae on ventral margin of peduncle. . . . . *Plumithoe* J. L. Barnard and Karaman, 1991

- Pereopods 3 and 4 with expanded bases and meri, antenna 2 with sparse or dense setae on all margins. . . . . *Sunamphitoe* Spence Bate, 1857

#### *Amphithoides* Kossmann, 1880

*Amphithoides* Kossmann, 1880: 135. – J. L. Barnard and Karaman, 1991: 100. – Poore and Lowry, 1997: 898. – Peart, 2014: 886. (Type species: *Amphithoides longicornis* Kossmann, 1880, by original designation)

Diagnosis.—Epistome and upper lip angle directed ventrally, approximately 90° to ventral margin of head. Antenna 1 accessory flagellum present, 2-articulate. Mandibular molar present, well developed, palp with 3 articles, slender, article 3 smooth distally. Lower lip outer plate notched, inner lobe shorter than outer lobe. Maxilla 2 palp present, well developed. Maxilla 2 outer plate broader than inner plate. Coxae long. Gnathopod 1 subequal in size to gnathopod 2. Gnathopod 1 coxae produced anteroventrally; palm acute. Pereopods 3, 4 basis narrow; merus not anteriorly expanded. Pereopods 5-7 simple. Pereopods 6-7 propodus subrectangular; distal articles slender. Epimeron 3 with small acute distoventral tooth. Uropod 1 position in situ reaching apices of uropod 2 rami; peduncle with long, acute distoventral spur, lateral setal fringe absent. Uropod 2 peduncle without laterodistal projection, lateral setal fringe absent. Uropod 3 rami narrow; outer ramus with 1 reduced recurved, 1 straight robust seta; denticles, lateral setal fringe absent. Telson subtriangular; cusps, denticles absent, apical setae.

Remarks.—*Amphithoides* is sister to the remaining amphithoids and is closest to *Paragrubia*. *Amphithoides* is similar to *Paragrubia* by the structure of uropod 3 rami and the distal setae on the outer ramus of uropod 3. In *Paragrubia* and *Amphithoides* the uropod 3 rami are narrow and the outer rami have reduced non-curved distal robust setae, whereas other amphithoids have broad uropod 3 rami and strongly recurved distal robust setae on the outer ramus of uropod 3. *Amphithoides* and *Paragrubia* are also similar to *Cymadusa*, and the distantly related genus *Paradusa*. These four groups all have an accessory flagellum on antenna 1 and *Paragrubia*, *Amphithoides* and some species of *Cymadusa* have a tooth on the posteroventral corner of epimeron 3.

Species Included.—*Amphithoides longicornis* Kossmann, 1880; *A. mahafalensis* Ledoyer, 1967; *A. patrizii* Maccagno, 1936.

#### *Amphitholina* Ruffo, 1953

##### Fig. 3A

*Amphitholina* Ruffo, 1953: 5. – Myers, 1974: 463-469. – J. L. Barnard and Karaman, 1991: 101. – Poore and Lowry, 1997: 898. – Peart, 2014: 886. (Type species: *Amphithoe cuniculus* (Stebbing, 1874), by original designation)

Diagnosis.—Epistome and upper lip angle directed anteriorly. Antenna 1 accessory flagellum absent. Mandible molar absent; palp absent. Lower lip outer plate entire. Maxilla 1 palp absent. Maxilla 2 outer plate broader than inner plate. Coxae short. Gnathopod 1 smaller than gnathopod 2, coxae not produced anterodistally, palm obtuse. Pereopods 3, 4 basis expanded; merus anteriorly expanded. Pereopods 5-7 weakly prehensile. Pereopods 6, 7 propodus subrectangular; distal articles slender. Epimeron 3 without distoventral tooth. Uropod 1 length in situ reaching halfway along

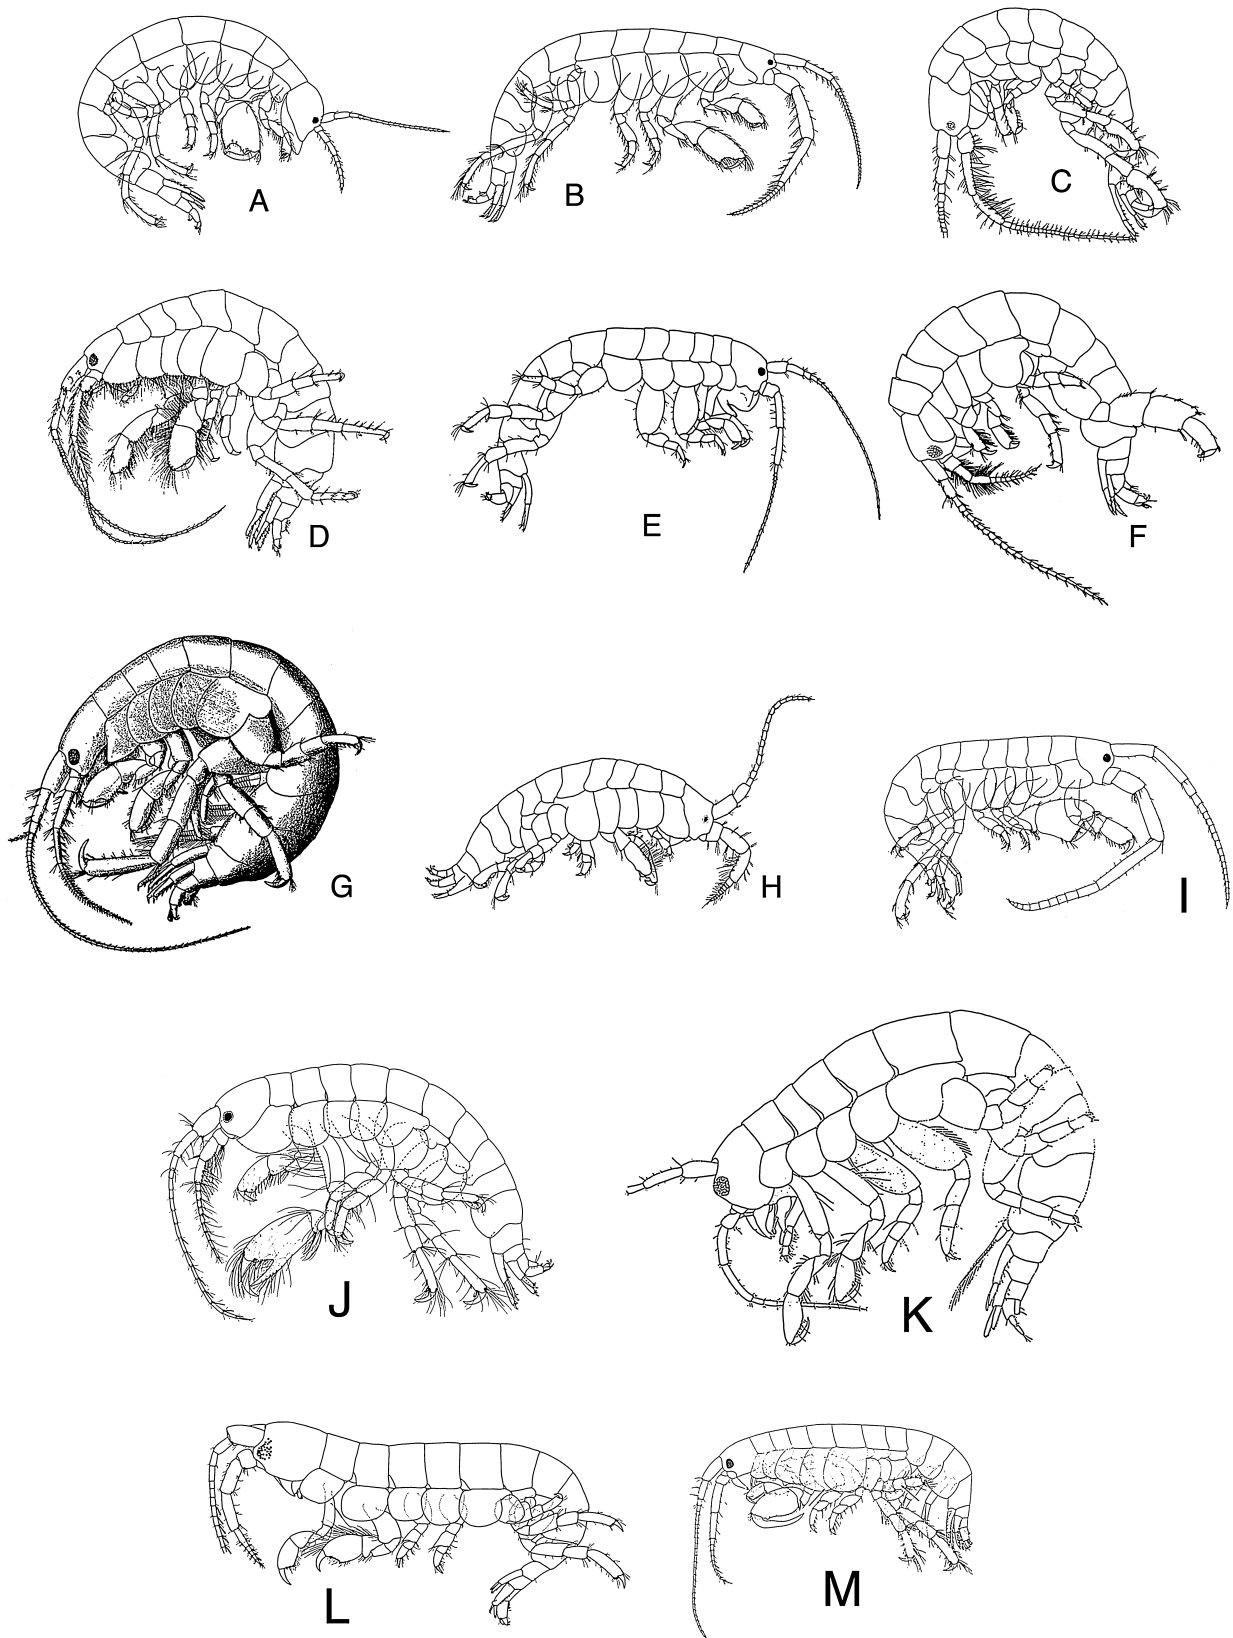

Fig. 3. Habitus of the amphithoid genera (generally type species). A, *Amphitholina cuniculus* (after Lincoln, 1979); B, *Ampithoe rubricata* (after Lincoln, 1979); C, *Austrothoe jimlowryi* (after Peart, 2014); D, *Cymadusa filosa* (after Peart, 2004); E, *Exampithoe kutti* (after Poore and Lowry, 1997); F, *Macropisthopous stebbingi*; G, *Paragrubia vorax* (after Chevreux, 1901); H, *Paranexes yallingup* (after Peart, 2014); I, *Pleonexes gammaroides* (after Lincoln, 1976); J, *Plumithoe hirsuta* (after Myers, 1985); K, *Pseudoamphithoides incurvaria* (after Just, 1977); L, *Pseudopleonexes sheardi* (after Just, 2002); M, *Sunamphitoe pelagica* (after Bousfield, 1973); *Amphithoides* and *Paradusa* are not represented due to the lack of whole animal illustrations.



peduncle of uropod 2; peduncle distoventral spur absent, lateral setal fringe present extending length of peduncle. Uropod 2 peduncle laterodistal projection absent, lateral setal fringe absent. Uropod 3 rami broad; outer ramus with 2 large recurved robust setae, lateral denticles present, lateral setal fringe absent. Telson subtriangular; cusps expanded to form large hooks; denticles, setae absent.

Remarks.—*Amphitholina* is defined by a suite of apomorphies. These include: epistome and upper lip directed forward instead of straight down, mandibular molar absent, mandibular palp absent, an entire lower lip, maxilla 1 palp absent, and an obtuse gnathopod 1 propodal palm. *Amphitholina* is most closely related to *Pseudopleonexes*.

Species Included.—*Amphitholina cuniculus* (Stebbing, 1874).

#### *Ampithoe* Leach, 1814

##### Fig. 3B

*Ampithoe* Leach, 1814: 403. – J. L. Barnard and Karaman, 1991: 102. – Poore and Lowry, 1997: 898. – Peart, 2007a: 1-95. – Peart, 2014: 886. (Type species: *Cancer (Gammarus) rubricatus* Montagu, 1808, by monotypy)  
*Anisopus* Templeton, 1836: 185. (Preoccupied *Anisopus* Meigen, 1803) (Diptera). (Type species: *Anisopus dubius* Templeton, 1836)  
*Amphitho (sic)* – Dana, 1852: 213.

Diagnosis.—Epistome, upper lip angle directed ventrally, approximately 90° to head ventral margin. Antenna 1 accessory flagellum absent. Mandible molar well developed; palp 3-articulate, stout, article 3 smooth distally. Lower lip outer plate notched, inner lobe shorter than outer lobe. Maxilla 1 palp well developed. Maxilla 2 outer plate broader than inner plate. Coxae long. Gnathopod 1 smaller than gnathopod 2, coxa produced forward anteroventrally, palm acute. Pereopods 3, 4 basis narrow; merus anteriorly narrow. Pereopods 5-7 simple. Pereopods 6, 7 propodus subrectangular; distal articles slender. Epimeron 3 without distoventral tooth. Uropod 1 in situ reaching apices of uropod 2 rami; peduncle distoventral spur absent, setal fringe present (usually) or absent. Uropod 2 peduncle laterodistal projection absent, setal fringe absent. Uropod 3 rami broad; outer ramus with 2 large recurved distal robust setae, denticles, setal fringe present or absent. Telson subtriangular; cusps small; denticles absent.

Remarks.—*Ampithoe* is a complex genus. Originally the largest amphithoid genus, this analysis suggests that *Ampithoe* is paraphyletic. *Pleonexes*, formerly considered a junior synonym of *Ampithoe*, is removed from synonymy and regarded here as a valid genus.

Species Included.—*Ampithoe africana* K. H. Barnard, 1925; *A. akuolaka* J. L. Barnard, 1970; *A. alluaudi* Chevreux, 1901; *A. aptos* (J. L. Barnard, 1969); *A. atauru* Hughes, 2015; *A. australiensis* Spence Bate, 1862; *A. bizseli* Özyaydinli and Coleman, 2012; *A. boeckii* Della Valle, 1893; *A. boiana* Peart, 2007; *A. brevipalma* Kim and Kim, 1988; *A. caddi* Poore and Lowry, 1997; *A. cinerea* Haswell, 1879; *A. cookana* Peart, 2007; *A. dalli* Shoemaker, 1938; *A. dentimana* Mateus and Mateus, 1986; *A. djakonovi* Gurjanova, 1938; *A. eremitis* Peart, 2007; *A. fastidiosa* Mateus and Mateus, 1991; *A. ferox* (Chevreux, 1901); *A. geographe* Peart, 2007; *A. grubiformis* Reid, 1951; *A. guaspere* J. L. Barnard,

1979; *A. hiana* Peart, 2007; *A. hinatore* J. L. Barnard, 1972; *A. hirsutamanus* Ortiz and Lemaitre, 1997; *A. hyalos* Peart, 2007; *A. katae* Peart, 2007; *A. kuala* Myers, 1985; *A. kussakini* Gurjanova, 1955; *A. lacertosa* Spence Bate, 1858; *A. lafkui* Appadoo and Myers, 2004; *A. longimana* Smith, 1873; *A. macrocornutus* (Kensley, 1971); *A. mantissa* Hughes and Peart, 2013; *A. marcuzzii* Ruffo, 1954; *A. mascarenensis* Appadoo and Myers, 2004; *A. megalopropopus* Stebbing, 1895; *A. merimbula* Peart, 2007; *A. ngana* Poore and Lowry, 1997; *A. ningaloo* Peart, 2007; *A. nobrei* Mateus and Mateus, 1986; *A. peronana* Peart, 2007; *A. platycera* Sivaprakasam, 1970; *A. plumulosa* Shoemaker, 1938; *A. plumulosa tepahue* J. L. Barnard, 1979; *A. pollex* Kunkel, 1910; *A. pomboi* Mateus and Afonso, 1974; *A. prolata* Hughes and Peart, 2013; *A. pseudongana* Peart, 2007; *A. rachanoi* Peart, 2002; *A. ramondi* Audouin, 1826; *A. ricaudyana* Peart and Hughes, 2014; *A. riedli* Krapp-Schickel, 1968; *A. roly* Peart, 2007; *A. rosema* Peart, 2007; *A. rubricata* (Montagu, 1808); *A. rubricatoides* Shoemaker, 1938; *A. sectimana* Conlan and Bousfield, 1982; *A. senegalensis* Schellenberg, 1925; *A. serraticauda* Rabindranath, 1972; *A. simulans* Alderman, 1936; *A. tahue* J. L. Barnard, 1979; *A. takeuchii* Peart and Hughes, 2014; *A. tarasovi* Butycheva, 1952; *A. ulladulla* Peart, 2007; *A. vacaregue* J. L. Barnard, 1979; *A. valida* Smith, 1873; *A. valida shimizuensis* Kim and Kim, 1988; *A. volki* Gurjanova, 1938; *A. waialua* J. L. Barnard, 1970; *A. youngsanensis* Kim and Kim, 1988; *A. zachsi* Gurjanova, 1938.

#### *Austrothoe* Peart, 2014

##### Fig. 3C

*Austrothoe* Peart, 2014: 887. (Type Species: *Austrothoe jimlowryi* Peart, 2014, by original designation)

Diagnosis.—Epistome, upper lip directed ventrally, 90° to ventral margin of head. Antenna 1 accessory flagellum with 1 article, vestigial. Mandible molar well developed; palp with 3-articulate, stout, article 3 distally smooth. Lower lip outer plate notched, inner lobes shorter than outer lobe. Maxilla 1 palp well developed. Maxilla 2 outer plate broader than inner plate. Coxae short. Gnathopod 1 subequal in size to gnathopod 2, gnathopod 1 coxa not produced forward anteroventrally, palm acute. Pereopods 3, 4 basis expanded; merus anteriorly expanded. Pereopods 5-7 strongly prehensile. Pereopods 6, 7 propodus produced proximally to form a heel; distal articles slender. Epimeron 3 without distoventral tooth. Uropod 1 position in situ reaching apices of uropod 2 rami; peduncle distoventral spur absent, setal fringe present. Uropod 2 peduncle without laterodistal projection, setal fringe absent. Uropod 3 rami broad; outer ramus with 2 large recurved distal robust setae, lateral denticles absent, setal fringe absent or reduced. Telson rectangular; cusps small; denticles present.

Remarks.—*Austrothoe* is closely related to *Exampithoe*. *Austrothoe*, and *Exampithoe* share a uropod 1 without a distoventral spur and short coxae (wider than long or as wide as long). *Austrothoe* differs from *Exampithoe* in that *Austrothoe* has a notched lower lip (entire in *Exampithoe*); a subrectangular telson (subtriangular telson in *Exampitho*); a vestigial accessory flagellum on antenna 1 (absent in *Exampithoe*); and the mandibular molar and palp are always

well developed (often reduced mandibular molar and palp in *Exampithoe*). Other synapomorphies of this genus are the expansion of the proximal end of the propodi of pereopods 6 and 7 to form a palm-like heel and the presence of denticles on the dorsal surface of the telson.

Species Included.—*Austrothoe jimlowryi* Peart, 2014; *A. ochos* Peart, 2014.

*Cymadusa* Savigny, 1816  
Fig. 3D

*Cymadusa* Savigny, 1816: 51, 109. – J. L. Barnard and Karaman, 1991: 104. – Poore and Lowry, 1997: 900. – Peart, 2007b: 1-53; 2014: 886. (Type species: *Cymadusa filosa* Savigny, 1816, by monotypy)

*Grubia* Czerniavsky, 1868: 103. (Type species: *Grubia taurica* Czerniavsky, 1868 = *Cymadusa crassicornis* Costa, 1853)

*Acanthogrubia* Stout, 1912: 143. (Type species: *Acanthogrubia uncinata* Stout, 1912)

Diagnosis.—Epistome, upper lip directed ventrally, 90° to ventral margin of head. Antenna 1 accessory flagellum present, with 3 articles. Mandible molar well developed; palp 3-articulate, stout, article 3 smooth. Lower lip outer plate notched, inner lobe shorter than outer lobe. Maxilla 1 palp well developed. Maxilla 2 outer plate broader than inner plate. Coxae long. Gnathopod 1 smaller than gnathopod 2, gnathopod 1 coxa produced forward anteroventrally, palm acute. Pereopods 3, 4 basis narrow; merus not anteriorly expanded. Pereopods 5-7 simple. Pereopods 6, 7 propodus subrectangular; distal articles slender. Epimeron 3 with or without distoventral tooth. Uropod 1 position in situ reaching to apices of uropod 2 rami; peduncle with long, acute distoventral spur, setal fringe of varying lengths generally present. Uropod 2 peduncle without laterodistal projection, setal fringe absent. Uropod 3 rami broad; outer ramus with 2 large recurved, robust distal setae, denticles mostly absent, setal fringe mostly present. Telson subtriangular; cusps small; denticles absent.

Remarks.—*Cymadusa* is a paraphyletic genus, closely related to *Paragrubia* and *Amphithoe*, but also superficially similar to *Ampithoides* and *Paradusa*. *Cymadusa* differs from *Paragrubia* by the length of the accessory flagellum of antenna 1 and the shape of uropod 3 rami. *Cymadusa* differs from *Ampithoides* by the shape of the third uropod rami, being broad and short (compared to the peduncle) in *Cymadusa*, and long (compared to the peduncle) and narrow in *Ampithoides*, and differs from *Paradusa* by the shape of the mandibular palp (narrow in *Paradusa*, stout in *Cymadusa*) and the uropod 3 rami (narrow in *Paradusa*) and short and broad in *Cymadusa*.

In their account of brackish water amphipods of the Parangipettai coast, India, Lyla et al. (1998) validated names for a genus and eight species of amphipods including a species of *Cymadusa*, *C. pathyi*. Lyla et al. (1998) attributed the names to the late K. Peethambaran Asari by placing “Peethambaran” after each species name, but without any type of further clarification or explanation of their intentions. Following a strict interpretation of Article 51 of the International Code of Zoological Nomenclature (ICZN, 1985, 1999) (see also Ng, 1994), however, the correct authorship of *Cymadusa pathyi* is Lyla, Velvizhi and Ajmal Khan, 1998, rather than Peethambaran. Similarly, for the other amphipod species and a genus name listed in the paper against

Peethambaran, the authorship should also be attributed to Lyla, Velvizhi and Ajmal Khan, 1998, as follows: *Natarajphotis* Lyla, Velvizhi and Ajmal Khan, 1998; *Urothoe serudactyla* Lyla, Velvizhi and Ajmal Khan, 1998; *Urothoe spinidactyla* Lyla, Velvizhi and Ajmal Khan, 1998; *Urothoe viswanthi* Lyla, Velvizhi and Ajmal Khan, 1998; *Eriopisa abhilashi* Lyla, Velvizhi and Ajmal Khan, 1998; *Gitanopsis gouriae* Lyla, Velvizhi and Ajmal Khan, 1998; *Parorchestia morini* Lyla, Velvizhi and Ajmal Khan, 1998; *Gammaropsis esturinus* Lyla, Velvizhi and Ajmal Khan, 1998; and *Natarajphotis manieni* Lyla, Velvizhi and Ajmal Khan, 1998.

Species Included.—*Cymadusa alyxis* Hughes and Lowry, 2009; *C. aungtonyae* Peart, 2002; *C. botulus* Hughes and Peart, 2013; *C. brevidactyla* (Chevreux, 1907); *C. cavimana* (Sivaprakasam, 1970); *C. chalongana* Peart, 2002; *C. chuawe* Peart, 2007; *C. compta* (Smith, 1873); *C. crassicornis* (Costa, 1857); *C. drummondiae* Hughes and Peart, 2013; *C. elegantis* Peart, 2007; *C. euclidius* Hughes and Peart, 2013; *C. excavata* Dang and Le, 2012; *C. filosa* Savigny, 1816; *C. grossimana* Ledoyer, 1984; *C. hadros* Hughes and Peart, 2013; *C. hallex* Hughes and Peart, 2013; *C. hawaiiensis* (Schellenberg, 1938); *C. hentyana* Hughes and Peart, 2013; *C. heronensis* Peart, 2007; *C. herrerae* Ortiz and Winfield, 2015; *C. hoeyae* Hughes and Lowry, 2009; *C. imbroglio* Rabindranath, 1972; *C. jigurru* Peart, 2007; *C. jubata* Hughes and Peart, 2013; *C. khbarnardi* Hughes and Lowry, 2009; *C. ledoyeri* Peart, 2004; *C. lituus* Peart and Hughes, 2014; *C. lumanus* Hughes and Peart, 2013; *C. lunata* Myers, 1985; *C. mariabyrneae* Hughes and Lowry, 2009; *C. microphthalma* (Chevreux, 1901); *C. munnu* Poore and Lowry, 1997; *C. oceanica* J. L. Barnard, 1955; *C. panwa* Peart, 2002; *C. paradisaea* Peart and Hughes, 2014; *C. pathyi* Lyla, Velvizhi and Ajmal Khan, 1998; *C. peartae* Andrade and Senna, 2013; *C. pemptos* Peart, 2007; *C. platys* Hughes and Peart, 2013; *C. priscileo* Hughes and Peart, 2013; *C. sardenta* (Oliveira, 1953); *C. setosa* (Haswell, 1879); *C. tattersalli* Peart, 2004; *C. thagaay* Peart, 2007; *C. tishana* Peart, 2007; *C. vadosa* Imbach, 1967; *C. wistari* Peart, 2007.

*Exampithoe* K. H. Barnard, 1925  
Fig. 3E

*Exampithoe* (*Exampithoe*) K. H. Barnard, 1925: 363. – Ledoyer, 1984: 23. – J. L. Barnard and Karaman, 1991: 105. – Poore and Lowry, 1997: 901. (Type species: *Exampithoe natalensis* K. H. Barnard, 1925)

*Exampithoe* (*Melanesius*) Ledoyer, 1984: 23. – J. L. Barnard and Karaman, 1991: 105. – Poore and Lowry, 1997: 901. (Type species: *Exampithoe* (*Melanesius*) *cooki* Ledoyer, 1984)

*Exampithoe* – Myers and Lowry, 2003: 467.

*Melanesius* – Myers and Lowry, 2003: 467.

Diagnosis.—Epistome, upper lip angle directed ventrally at 90° to ventral margin of head. Antenna 1 accessory flagellum absent. Mandible molar reduced or absent. Mandibular palp 2- or 3-articulate or absent; when present slender, article 3 distally smooth. Lower lip outer plate entire. Maxilla 1 palp well developed. Maxilla 2 outer plate either broader than or subequal to inner plate. Coxae short. Gnathopod 1 subequal to or smaller than gnathopod 2, gnathopod 1 coxa sometimes produced forward, palm acute. Pereopods 3, 4 basis expanded; merus anteriorly expanded. Pereopods 5-7 simple. Pereopods 6, 7 propodus subrectangular; distal

articles slender. Epimeron 3 without distoventral tooth. Uropod 1 position in situ reaching apices of uropod 2 rami; distoventral spur absent, setal fringe usually absent. Uropod 2 peduncle without laterodistal projection, setal fringe absent. Uropod 3 rami broad; outer ramus with 2 large recurved distal robust setae, denticles present, setal fringe absent. Telson subtriangular; cusps small; denticles absent, lateral setae.

Remarks.—Ledoyer (1984) originally proposed *Melanesius* as a subgenus of *Exampithoe* on the basis of the absence of the mandibular palp; it was subsequently given separate generic status (Myers and Lowry, 2003). Present cladistic results, however, demonstrate that *Exampithoe* is nested within *Melanesius*, justifying neither separate generic nor subgeneric status. *Melanesius* is therefore treated as a junior synonym of *Exampithoe*. *Exampithoe* is closely related to the recently established genus, *Austrothoe*; distinctions between the two genera are discussed under the account of the latter.

Species Included.—*Exampithoe burrowwo* Hughes and Peart, 2015; *E. compressa* Just, 2000; *E. cooki* Ledoyer, 1984; *E. gracilipes* Ledoyer, 1984; *E. halei* Just, 2000; *E. kutti* Poore and Lowry, 1997; *E. latibasis* (Appadoo and Myers, 2004); *E. natalensis* K. H. Barnard, 1925; *E. taylori* Hughes and Peart, 2015; *E. waratah*, Hughes and Peart, 2015.

*Macropisthopous* K. H. Barnard, 1916

Fig. 3F

*Macropisthopous* K. H. Barnard, 1916: 260. – J. L. Barnard and Karaman, 1991: 106. – Poore and Lowry, 1997: 901. (Type Species: *Macropisthopous stebbingi* K. H. Barnard, 1916, by monotypy)

Diagnosis.—Epistome and upper lip angle directed ventrally at 90° to ventral margin of head. Antenna 1 accessory flagellum absent. Mandible molar well developed; palp with 3-articulate, slender, article 3 smooth. Lower lip outer plate notched, lobes subequal height. Maxilla 1 palp well developed. Maxilla 2 outer plate broader than inner plate. Coxae long. Gnathopod 1 subequal in size to gnathopod 2, coxa not produced forward anteroventrally; palm obtuse. Pereopods 3, 4 basis expanded; merus anteriorly expanded. Pereopods 5-7 prehensile. Pereopods 6, 7 propodus subrectangular; distal articles broad. Epimeron 3 without distoventral tooth. Uropod 1 position in situ reaching apices of uropod 2 rami; distoventral spur absent, setal fringe absent. Uropod 2 peduncle without laterodistal projection; setal fringe absent. Uropod 3 rami broad; outer ramus with 2 large recurved distal robust setae, lateral denticles present, lateral setal fringe absent. Telson subtriangular; cusps absent; denticles absent.

Remarks.—*Macropisthopous* is closely related to *Pseudoamphithoides* but is morphologically close also to *Sunamphitoe*. It differs from *Pseudoamphithoides* by the presence of a well-developed maxilla 1 palp, broad uropod 3 rami and strongly recurved robust setae on the outer ramus of uropod 1. *Macropisthopous* differs from *Sunamphitoe* in the absence of the uropod 1 distoventral peduncular spur, the slender mandibular palp, the obtuse palms on both gnathopods 1 and 2.

Species Included.—*Macropisthopous stebbingi* K. H. Barnard, 1916.

*Paradusa* Ruffo, 1969

*Paradusa* Ruffo, 1969: 63. – J. L. Barnard and Karaman, 1991: 106. – Poore and Lowry, 1997: 902. – Appadoo and Myers, 2004: 332. (Type species: *Paradusa bilobata* Ruffo, 1969, by monotypy)

Diagnosis.—Epistome and upper lip angle directed ventrally at 90° to ventral margin of head. Antenna 1 accessory flagellum with 1 small article. Mandible molar well developed; palp with 3-articulate, slender, article 3 smooth. Lower lip outer plate notched, inner lobes shorter than outer lobes. Maxilla 1 palp well developed. Maxilla 2 plates subequal in width. Coxae long. Gnathopod 1 subequal in size to gnathopod 2, coxa produced forward anteroventrally; palm acute. Pereopods 3, 4 basis narrow; merus not anteriorly expanded. Pereopods 5-7 simple. Pereopods 6, 7 propodus subrectangular; distal articles slender. Epimeron 3 without distoventral tooth. Uropod 1 position in situ reaching apices of uropod 2 rami; distoventral spur large, acute, setal fringe reduced or absent. Uropod 2 peduncle without laterodistal projection, setal fringe absent. Uropod 3 rami broad; outer ramus with 2 large recurved distal robust setae, lateral denticles absent, lateral setal fringe absent. Telson subtriangular; cusps small; denticles absent.

Remarks.—Poore and Lowry (1997) synonymised *Paradusa* with *Cymadusa* on the basis of their presumed close relationship. Appadoo and Myers (2004), however, treated it as a separate genus. Present results support the latter classification and suggest *Paradusa* is more closely related to *Plumithoe* than *Cymadusa*.

Species Included.—*Paradusa bilobata* Ruffo, 1969; *P. mauritiensis* Ledoyer, 1978.

*Paragrubia* Chevreux, 1901

Fig. 3G

*Paragrubia* Chevreux, 1901: 426. – J. L. Barnard and Karaman, 1991: 107. – Poore and Lowry, 1997: 902. – Hughes and Peart, 2013: 70. – Peart, 2014: 886. (Type species: *Paragrubia vorax* Chevreux, 1901, by monotypy)

Diagnosis.—Epistome and upper lip angle directed ventrally, approximately 90° to head ventral margin. Antenna 1 accessory flagellum present, with 3 or more articles. Mandible palp 3-articulate, slender, article 3 smooth distally. Lower lip outer plate notched, inner lobe is subequal in height to outer lobe. Maxilla 1 palp well developed. Maxilla 2 outer plate broader than the inner plate. Coxae long. Gnathopod 1 subequal to or larger than gnathopod 2; gnathopod 1 coxa is produced forward anteroventrally, palm acute. Pereopods 3, 4 basis narrow; merus not anteriorly expanded. Pereopods 5-7 simple. Pereopods 6, 7 propodus subrectangular; distal articles slender. Epimeron 3 with small acute distoventral tooth. Uropod 1 position in situ reaching apices of uropod 2 rami; peduncle with long, acute distoventral spur, setal fringe absent. Uropod 2 peduncle without laterodistal projection, setal fringe absent. Uropod 3 rami narrow; outer ramus with 1 recurved and 1 straight robust seta; lateral denticles absent, lateral setal fringe present. Telson subtriangular, cusps small, denticles absent, setae always in medial oblique rows.

Remarks.—*Paragrubia* is closely related to *Cymadusa* and *Amphithoides*. These three genera are “basal” or near “basal” amphithoids. Originally, one of the main characters that distinguished *Paragrubia* from *Cymadusa* was the larger size of gnathopod 1 relative to gnathopod 2. However, the majority of the species placed in the genus have the gnathopod 1 subequal to or larger than gnathopod 2; they are placed in *Paragrubia* because of the multi-articulate accessory flagellum and reduced curvature of the uropod 3 outer rami setae (similar to *Amphithoides* but different from *Cymadusa*) and the shape and setation of the rami of uropod 3 and the lower lip notched outer plate lobes are always of equal height.

Species Included.—*Paragrubia apoorei* Hughes and Peart, 2013; *P. cassini* Hughes and Peart, 2013; *P. dongara* Hughes and Peart, 2013; *P. dwyeri* Hughes and Peart, 2013; *P. edgari* Peart in Hughes and Lowry, 2009; *P. latipoda* Ren, 2001; *P. pilipes* (Ledoyer, 1984); *P. springthorpei* Hughes and Peart, 2013; *P. variata* (Sheard, 1936); *P. vorax* Chevreaux, 1901.

*Paranexes* Peart, 2014

Fig. 3H

*Paranexes* Peart, 2014: 897. (Type species: *Paranexes yallingup* Peart, 2014, by original designation)

Diagnosis.—Epistome and upper lip angle directed ventrally at 90°. Antenna 1 accessory flagellum absent. Mandible molar well developed; palp 3-articulate, stout, article 3 smooth distally. Lower lip outer plate notched, inner lobe shorter than outer lobe. Maxilla 1 palp well developed. Maxilla 2 outer plate broader than inner plate. Coxae long. Gnathopod 1 smaller than or subequal to gnathopod 2, coxa produced forward anteroventrally, palm acute. Pereopods 3, 4 basis expanded; merus anteriorly expanded. Pereopods 5-7 strongly prehensile. Pereopods 6, 7 propodus subrectangular; distal articles broad. Uropod 1 position in situ reaching apices of uropod 2 rami; male, female peduncle without distoventral spur, setal fringe long reaching entire length of peduncle. Uropod 1 outer ramus much narrower than inner ramus. Uropod 2 peduncle without laterodistal projection, no setal fringe. Uropod 3 rami broad; outer ramus with 2 large recurved distal robust setae, denticles present, setal fringe absent. Telson subtriangular, with cusps produced to form 2 large hooks; denticles absent, apical and lateral setae.

Remarks.—*Paranexes* is most closely related to *Pleonexes* but is also morphologically similar to *Pseudopleonexes* and *Ampithoe*. It resembles *Pseudopleonexes* and *Pleonexes* in the expansion of pereopods 3 and 4 bases and meri and strongly prehensile pereopods 5-7 and the strong hooked cusps on the telsons. *Paranexes* differs from *Pseudopleonexes* by the well-developed maxilla 1 palp, the palmar angle of gnathopod 1 propodus, the position of uropod 1 in relation to uropod 2, and the absence of the peduncular projection on male uropod 2. *Paranexes* and *Ampithoe* share an acute gnathopod 1 palm and lack the posterodistal peduncular spur on uropod 1. The two genera differ by the angle of the epistome and upper lip, and the expansion of pereopods 3 and 4 bases and meri, and the strongly prehensile pereopods 5-7.

Species Included.—*Paranexes yallingup* Peart, 2014; *P. galaharar* Peart, 2014.

*Pleonexes* Spence Bate, 1857

Fig. 3I

*Pleonexes* Spence Bate, 1856: 59 (*nomen nudum*); 1857: 147 (Type species: *Pleonexes gammaroides* Spence Bate, 1857)

Diagnosis.—Epistome and upper lip angle directed ventrally, approximately 90° to head ventral margin. Antenna 1 accessory flagellum absent. Mandible molar well developed; palp 3-articulate, stout, article 3 distally smooth. Lower lip outer plate notched, inner lobe shorter than outer lobe. Maxilla 1 palp well developed. Maxilla 2 outer plate broader than inner plate. Coxae long. Gnathopod 1 smaller than gnathopod 2, coxa produced forward anteroventrally, palm acute. Pereopods 3, 4 basis slightly expanded; merus slightly anteriorly expanded. Pereopods 5-7 prehensile. Pereopods 6, 7 propodus subrectangular; distal articles slender. Epimeron 3 without distoventral tooth. Uropod 1 position in situ reaching apices of uropod 2 rami; peduncle distoventral spur reduced, rounded in males, absent in females, setal fringe long, reaching entire length of peduncle; rami of similar length, inner only slightly longer than outer. Uropod 2 peduncle laterodistal projection absent, setal fringe absent. Uropod 3 rami broad; outer ramus with 2 large recurved distal robust setae, denticles present, setal fringe absent. Telson subtriangular; cusps small; denticles absent.

Remarks.—*Pleonexes*, formerly considered a junior synonym of *Ampithoe*, is herein resurrected. It is separated from *Ampithoe* by the presence of a rounded, reduced uropod 1 peduncular spur, sometimes large telsonic cusps, expanded bases and meri of pereopods 3, 4, and prehensile pereopods 5-7.

Species Included.—*Pleonexes auriculata* (Rabindranath, 1972); *P. gammaroides* Spence Bate, 1856; *P. helleri* (Karaman, 1975); *P. kaneohe* (J. L. Barnard, 1970); *P. kaneohe navosa* (Myers, 1985); *P. kava* (Myers, 1985); *P. koreana* (Kim and Kim, 1988); *P. kulafi* (J. L. Barnard, 1970); *P. maxillissius* (Ledoyer, 1984); *P. meganae* (Peart, 2007); *P. parakava* (Peart, 2007); *P. poiipu* (J. L. Barnard, 1970); *P. rotunda* (Peart, 2007).

*Plumithoe* J. L. Barnard and Karaman, 1991

Fig. 3J

*Plumithoe* J. L. Barnard and Karaman, 1991: 109. – Poore and Lowry, 1997: 903. (Type species: *Amphithoe plumicornis* Ledoyer, 1979, by original designation)

Diagnosis.—Epistome and upper lip angle directed ventrally at 90° to ventral margin of head. Antenna 1 accessory flagellum absent. Antenna 2 peduncle with long, dense, plumose setae along ventral margin of the peduncle only. Mandible molar well developed; palp 3-articulate, slender, article 3 distally smooth. Lower lip outer plate notched, inner lobes shorter than outer lobes. Maxilla 1 palp well developed. Maxilla 2 outer plate broader than inner plate. Coxae long. Gnathopod 1 smaller than gnathopod 2; gnathopod 1 coxa produced anteroventrally, palm acute. Pereopods 3, 4 basis narrow; merus anteriorly expanded. Pereopods 5-7 simple. Pereopods 6, 7 propodus subrectangular; distal arti-

cles slender. Epimeron 3 without distoventral tooth. Uropod 1 position in situ reaching midlength of uropod 2 peduncle; distoventral spur large, acute, setal fringe sometimes present. Uropod 2 peduncle without laterodistal projection, setal fringe present. Uropod 3 rami narrow; outer ramus with 2 large recurved distal robust setae, denticles absent, setal fringe absent. Telson subtriangular; cusps small; denticles absent.

Remarks.—*Plumithoe* is morphologically similar to both *Cymadusa* and *Ampithoe*. The main differences between *Plumithoe* and *Cymadusa* are that *Plumithoe* lacks an accessory flagellum on antenna 1, and has large tufts of long, plumose setae on the ventral margins of articles 3-5 of antenna 2. Some species of both *Cymadusa* and *Ampithoe* have setose antennae 2, but the arrangement of the setal tufts is totally different in species of *Plumithoe*. *Plumithoe* differs from *Ampithoe* by the presence of an acute distoventral spur on the peduncle of uropod 1, which is absent in *Ampithoe*. *Plumithoe* differs from both *Cymadusa* by having a long setal fringe on the uropod 2 peduncle.

Species Included.—*Plumithoe acuticoxa* Myers, 2012; *P. bouleri* Peart and Hughes, 2014; *P. hirsutus* (Ledoyer, 1978); *P. lata* Myers, 2012; *P. madagascariensis* Myers, 2012; *P. plumicornis* (Ledoyer, 1979); *P. quadrimana* (Haswell, 1879).

*Pseudoamphithoides* Ortiz, 1976  
Fig. 3K

*Pseudoamphithoides* Ortiz, 1976: 12. – J. L. Barnard and Karaman, 1991: 109-110. – Poore and Lowry, 1997: 903. (Type species: *Pseudoamphithoides bacescui* Ortiz, 1976, by original designation and monotypy) *Amphyllodomus* Just, 1977: 229. (Type species: *Amphyllodomus incurvaria* Just, 1977, by original designation and monotypy)

Diagnosis.—Epistome and upper lip angle directed ventrally at 90° to ventral margin of head. Antenna 1 accessory flagellum absent. Mandible molar well developed; palp 3-articulate, slender, article 3 beaked. Lower lip outer plate notched, inner lobe shorter than outer lobe. Maxilla 1 palp reduced. Maxilla 2 outer plate broader than inner plate. Coxae long. Gnathopod 1 subequal to gnathopod 2; coxa not produced forward anteroventrally, palm acute. Pereopods 3, 4 basis expanded; merus anteriorly narrow. Pereopods 5-7 prehensile. Pereopods 6, 7 propodus subrectangular; distal articles slender. Epimeron 3 without distoventral tooth. Uropod 1 position in situ short, reaching midlength of uropod 2 peduncle; distoventral spur absent, setal fringe long. Uropod 2 peduncle without laterodistal projection, setal fringe absent. Uropod 3 rami narrow; outer ramus with large straight distal robust seta and weak smaller robust seta, denticles, lateral fringe absent. Telson subtriangular; cusps absent; denticles absent, lateral setae.

Remarks.—*Pseudoamphithoides* is closely related to *Macropisthopous*, and can be distinguished by having a reduced maxilla 1 palp, the narrow rami of uropod 3, and the reduced curvature of the robust setae on the uropod 3 outer ramus.

Species Included.—*Pseudoamphithoides bacescui* Ortiz, 1976; *P. incurvaria* (Just, 1977).

*Pseudopleonexes* Conlan, 1982  
Fig. 3L

*Pseudopleonexes* Conlan, 1982: 2020. – J. L. Barnard and Karaman, 1991: 110. – Poore and Lowry, 1997: 903-904. – Peart, 2006: 1-22. (Type species: *Pleonexes lessoniae* Hurley, 1954, by original designation)

Diagnosis.—Epistome and upper lip angle directed posteriorly at more than 45°. Antenna 1 accessory flagellum absent. Mandible molar well developed; palp 3-articulate, slender, article 3 strongly beaked. Lower lip outer plate weakly notched, lobes of equal size. Maxilla 1 palp reduced. Maxilla 2 outer plate broader than inner plate. Coxae short. Gnathopod 1 smaller than gnathopod 2, gnathopod 1 coxa not produced anteroventrally, palm transverse. Pereopods 3, 4 basis expanded; merus anteriorly expanded. Pereopods 5-7 strongly prehensile. Pereopods 6, 7 propodus subrectangular; distal articles occasionally broad. Epimeron 3 without distoventral tooth. Uropod 1 position in situ short, reaching midlength of uropod 2 peduncle; peduncle distoventral spur absent, setal fringe sometimes present. Uropod 2 peduncle with laterodistal projection, setal fringe absent. Uropod 3 rami broad; outer ramus with 2 large recurved distal robust setae, denticles present, setal fringe absent. Telson subtriangular; cusps expanded to form large hooks; denticles absent.

Remarks.—*Pseudopleonexes* is closely related to *Amphitholina* but differs by the angle of the epistome and upper lip, the development of the mandibular molar and palp, weakly notched instead of entire lower lip, presence of the peduncular projection on uropod 2.

Species Included.—*Pseudopleonexes burney* Peart, 2006; *P. justii* Peart, 2006; *P. lessoniae* (Hurley, 1954); *P. nexis* Peart, 2006; *P. sheardi* (Just, 2002).

*Sunamphitoe* Spence Bate, 1857  
Fig. 3M

*Sunamphitoe* Spence Bate, 1857: 147. – J. L. Barnard and Karaman, 1991: 111. – Poore and Lowry, 1997: 904. (Type species: *Amphithoe pelagica* H. Milne Edwards, 1830, by subsequent designation (Chevreux and Page, 1925)) *Peramphithoe* Conlan and Bousfield, 1982: 60. – J. L. Barnard and Karaman, 1991: 108. – Poore and Lowry, 1997: 902. (Type species: *Ampithoe femorata* Krøyer, 1845, by original designation)

Diagnosis.—Epistome and upper lip directed ventrally, almost 90° to ventral margin of head. Antenna 1 accessory flagellum absent. Mandible molar well developed. Mandibular palp absent or 3-articulate; when present stout, article 3 smooth distally. Lower lip outer plate notched, inner and outer lobes subequal in height. Maxilla 1 palp well developed. Maxilla 2 outer plate similar or broader than inner plate. Coxae long. Gnathopod 1 smaller than gnathopod 2, gnathopod 1 coxa not produced anterodistally, palm transverse. Pereopods 3, 4 basis expanded; merus anteriorly expanded. Pereopods 5-7 simple. Pereopods 6, 7 propodus subrectangular; distal articles slender to very broad. Epimeron 3 without distoventral tooth. Uropod 1 position in situ reaching apices of rami of uropod 2; peduncle with long, acute distoventral spur, setal fringe present or absent. Uropod 2 peduncle without laterodistal projection, setal fringe absent. Uropod 3 rami broad; outer ramus with 2 large recurved distal robust setae, denticles, setal fringe present or absent. Tel-

son subtriangular; cusps small; denticles absent, setae lateral.

Remarks.—*Sunamphitoe* is morphologically similar to *Macropisthopous* and *Ampithoe*. *Sunamphitoe* differs from *Macropisthopous* by having simple (as opposed to prehensile) pereopods 5-7 and the presence of a long, acute spur on the peduncle of uropod 1. *Sunamphitoe* differs from *Ampithoe* in the transverse palm of gnathopod 1, the expansion of pereopods 3, 4 bases and meri, and a long, acute spur on the peduncle of uropod 1. Within *Sunamphitoe*, the mandibular palp varies from absent to having 3 articles. The presence or absence of the mandibular palp was originally used to separate *Sunamphitoe* from *Peramphithoe*. Given that the palp is independently gained and lost within the *Sunamphitoe* + *Peramphithoe* clade, and that putative species of *Sunamphithoe* and *Peramphithoe* are nested together, the two genera are nevertheless herein synonymised.

Species Included.—*Sunamphitoe africana* (Milne and Griffiths, 2013); *S. annenkovae* (Gurjanova, 1938); *S. aorangi* (J. L. Barnard, 1972); *S. baegryeongensis* (Kim and Kim, 1988); *S. bungareei* Hughes and Peart, 2013; *S. chujaensis* Kim, Hong, Conlan and Lee, 2012; *S. eoa* (Brüggen, 1907); *S. falsa* (K. H. Barnard, 1932); *S. fantome* Peart in Hughes and Lowry, 2009; *S. femorata* (Krøyer, 1845); *S. graxon* Freewater and Lowry, 1994; *S. guryongensis* Shin et al., 2015; *S. humeralis* (Stimpson, 1864); *S. kanaka* Peart and Hughes, 2014; *S. lessoniophila* (Conlan and Bousfield, 1982); *S. lindbergi* (Gurjanova, 1938); *S. mea* (Gurjanova, 1938); *S. namhaensis* (Kim and Kim, 1988); *S. orientalis* (Dana, 1853); *S. parmerong* (Poore and Lowry, 1997); *S. pelagica* (H. Milne Edwards, 1830); *S. plea* (J. L. Barnard, 1965); *S. plumosa* Stephensen, 1944; *S. sineplumosa* Kim and Kim, 1991; *S. spuria* (Krapp-Schickel, 1978); *S. stypotrurpetes* (Conlan and Chess, 1992); *S. tea* (J. L. Barnard, 1965); *S. tjibaoui* Peart and Hughes, 2014.

#### ACKNOWLEDGEMENTS

This project was started as part of RAP's doctoral thesis, and so is indebted to Drs J. K. Lowry and S. A. Smith for their supervision and encouragement. We are indebted to Drs Peter Castro and C. Oliver Coleman for their care in editing and their many helpful suggestions. This project was partially funded by the Joyce Vickery Research Fund (Linnean Society of New South Wales), an Australian Museum Postgraduate Grant, and a University of New England Research Scholarship. This is a contribution from the Australian Museum Research Institute.

#### REFERENCES

- Alderman, A. L. 1936. Some new and little known amphipods of California. University of California Publications in Zoology 41: 53-74.
- Andrade, L. F., and A. R. Senna. 2013. A new species of *Cymadusa* Savigny, 1816 (Crustacea: Amphipoda: Amphithoidae) from northeastern Brazil. Nauplius 21: 53-63.
- Appadoo, C., and A. A. Myers. 2004. Corophiidea (Crustacea: Amphipoda) from Mauritius. Records of the Australian Museum 56: 331-362.
- Audouin, V. 1826. Explication sommaire des planches de Crustacés de l'Égypte et de la Syrie, publiées par Jules-César Savigny, membre de l'Institut; offrant un exposé des caractères naturels des genres, avec la distinction des espèces, pp. 77-98. In, J. C. Savigny, Description de l'Égypte, Histoire Naturelle 1.
- Barnard, J. L. 1955. Gammaridean Amphipoda (Crustacea) in the collections of Bishop Museum. Bernice P. Bishop Museum Bulletin 215: 1-46.
- . 1962. Benthic marine Amphipoda of southern California: families Aoridae, Photidae, Ischyroceridae, Corophiidae, Podoceridae. Pacific Naturalist 3: 1-72.
- . 1965. Marine Amphipoda of the family Amphithoidae from southern California. Proceedings of the United States National Museum 118: 1-46.
- . 1969. Gammaridean Amphipoda of the rocky intertidal of California: Monterey Bay to La Jolla. Bulletin of the United States National Museum 258: 83-89.
- . 1970. Sublittoral Gammaridea (Amphipoda) of the Hawaiian Islands. Smithsonian Contributions to Zoology 34: 44-60.
- . 1972. The marine fauna of New Zealand: algae-living littoral Gammaridea (Crustacea Amphipoda). Memoir of the New Zealand Oceanographic Institute 62: 7-216.
- . 1979. Littoral gammaridean Amphipoda from the Gulf of California and the Galapagos Islands. Smithsonian Contributions to Zoology 271: 1-149.
- , and G. S. Karaman. 1991. The families and genera of marine gammaridean amphipods (except marine Gammaroidea). Parts 1, 2. Records of the Australian Museum 13(Supplement): 1-866.
- Barnard, K. H. 1916. Contributions to the crustacean fauna of South Africa. Annals of the South African Museum 15: 105-302.
- . 1925. Contributions to the crustacean fauna of South Africa, eight further additions to the list of Amphipoda. Annals of the South African Museum 20: 319-380.
- . 1932. Amphipoda. Discovery Reports 5: 1-326.
- Berge, J., G. Boxshall, and W. Vader. 2001. Phylogenetic analysis of the Amphipoda, with special emphasis on the origin of the Stegocephalidae. Polskie Archiwum Hydrobiologii 47: 379-400.
- Bousfield, E. L. 1973. Shallow-Water Gammaridean Amphipoda of New England. Cornell University Press, Ithaca, NY.
- Bulycheva, A. I. 1952. Novye vidy bokoplavov (Amphipoda, Gammaridea) iz Japonskogo Morja. Trudy Zoologicheskogo Instituta Akademii Nauk SSSR 12: 195-250.
- Chess, J. R. 1993. Effects of the stipe-boring amphipod *Peramphithoe stypotrurpetes* (Corophioidea: Amphithoidae) and grazing gastropods on the kelp *Laminaria setchellii*. Journal of Crustacean Biology 13: 638-646.
- Chevreaux, E. 1901. Crustacés amphipodes mission scientifique de M. Ch. Alluaud aux Iles Seychelles (mars, avril, mai, 1892). Mémoires de la Société de France 14: 388-438.
- . 1907. Diagnoses d'amphipodes nouveaux recueillis dans les possessions Françaises de L'Océanie, par M.L. Seurat, directeur du laboratoire de recherches biologiques de Rikitea. Bulletin du Muséum d'Histoire naturelle 13: 412-417.
- . 1908. Amphipodes recueillis dans les possessions Françaises de l'Océanie, par M. Le Dr Seurat, directeur du laboratoire de recherches biologiques de Rikitea (îles Gambier). Extrait des Mémoires de la Société Zoologique de France 10: 470-472.
- , and L. Fage. 1925. Amphipodes. Faune de France 9: 488-489.
- Conlan, K. E. 1982. Revision of the gammaridean amphipod family Amphithoidae using numerical analytical methods. Canadian Journal of Zoology 60: 2015-2027.
- , and E. Bousfield. 1982. The amphipod superfamily Corophiidea in the north eastern Pacific region, family Amphithoidae: systematics and distributional ecology. Publications in Biological Oceanography, National Museum of Canada 10: 45-75.
- , and J. R. Chess. 1992. Phylogeny and ecology of a kelp-boring amphipod *Peramphithoe stypotrurpetes*, new species (Corophioidea: Amphithoidae). Journal of Crustacean Biology 12: 410-422.
- Costa, A. 1853. Relazione sulla memoria del Dottor Achille Costa, di Ricerche su' Crostacei Amphipodi del Regno di Napoli. Rendiconti della Società Reale Borbonica, Accademia delle Scienze (n. s.) 2: 167-178.
- . 1857. Ricerche sui Crostacei amphipodi del regno di Napoli. Memorie della Reale Accademia de Scienze di Napoli 1: 165-235.
- Cruz-Rivera, E., and M. E. Hay. 2001. Macroalgal traits and the feeding and fitness of an herbivorous amphipod: the roles of selectivity, mixing, and compensation. Marine Ecology Progress Series 218: 249-266.
- Czerniavsky, V. 1868. Materialia ad Zoographiam Ponticam Comparatam. I. Universitatis Charcoviensis. Kharkov University, Kharkov.
- Dallwitz, M. J. 2005. Overview of the DELTA system, available on line at <http://delta-intkey.com>.
- Dana, J. D. 1852. Conspectus crustaceorum quae in orbis terrarum circumnavigatione, Carlo Wilkes e classe Reipublicae Faedoratae Duce, lexit et descripsit Jacobus D. Dana pars III (Amphipoda #1). Proceedings of the American Academy of Arts and Sciences 2: 201-220.

- . 1853. Crustacea. Part II. United States Exploring Expedition 14: 689-1618.
- Dang, N. T., and H. A. Le. 2012. New Amphipoda crustaceans (*sic*) species recently found in Vietnam nearshore waters. *Tapp Chí Sinh Học* (Journal of Biology, Vietnam Academy of Science and Technology) 34: 145-157.
- Della Valle, A. 1893. Gammarini del Golfo di Napoli. Fauna und Flora des Golfes von Neapel und der angrenzenden Meeres-Abschnitte. *Monographie* 20: 1-948.
- Duffy, J. E. 1990. Amphipods on seaweeds: partners or pests? *Oecologia* 83: 267-276.
- , and M. E. Hay. 1991. Food and shelter as determinants of food choice by an herbivorous marine amphipod. *Ecology* 72: 1286-1298.
- Edgar, G. J. 1983. The ecology of south-east Tasmanian phytoplankton communities. I. Spatial organization on a local scale. *Journal of Experimental Marine Biology and Ecology* 70: 129-157.
- Freewater, P., and J. K. Lowry. 1994. *Sunamphithoe graxon* sp. nov. (Crustacea: Amphipoda: Ampithoidae): first record of the genus in Australian waters. *Invertebrate Taxonomy* 8: 675-682.
- Gurjanova, E. F. 1938. Amphipoda, Gammaroidea of Siakhu Bay and Sudzukha Bay (Japan Sea). Reports of the Japan Sea Hydrobiological Expedition of the Zoological Institute of the Academy of Sciences, USSR in 1934 1: 241-404.
- . 1955. Novye vidy bokoplavov (Amphipoda, Gammaridea) iz severnoi chasti Tixogo Okeana. *Trudy Zoologicheskogo Instituta Akademii Nauk SSSR* 18: 166-218.
- Haswell, W. A. 1879. On Australian Amphipoda. *Proceedings of the Linnean Society of New South Wales* 4: 245-279.
- Hay, M. E., J. E. Duffy, C. A. Pfister, and W. Fenical. 1987. Chemical defense against different marine herbivores: are amphipods insect equivalents? *Ecology* 68: 1567-1580.
- , ———, and W. Fenical. 1990. Host-plant specialization decrease predation on a marine amphipod: an herbivore in plant's clothing. *Ecology* 71: 733-743.
- Hirayama, A. 1984. Taxonomic studies on the shallow water gammaridean Amphipoda of West Kyushu, Japan – II. Corophiidae. *Publications of the Seto Marine Biological Laboratory* 29(1-3): 1-92.
- Holmlund, M. B., C. H. Peterson, and M. E. Hay. 1990. Does algal morphology affect amphipod susceptibility to fish predation? *Journal of Experimental Marine Biology and Ecology* 139: 65-83.
- Hughes, L. E. 2015. Ampithoidae and Maeridae amphipods from Timor-Leste (Crustacea: Peracarida). *Records of the Australian Museum* 67: 83-108.
- , and J. K. Lowry. 2009. Ampithoidae, pp. 1-930. In: J. K. Lowry and A. A. Myers (eds.), *Benthic Amphipoda* (Crustacea: Peracarida) of the Great Barrier Reef, Australia. *Zootaxa* 2260.
- , and R. A. Peart. 2013. New species and new records of Ampithoidae (Peracarida: Amphipoda) from Australian waters. *Zootaxa* 3719(1): 1-102.
- , and R. A. Peart. 2015. Three new species of Exampithoe from Australia and New Zealand (Ampithoidae: Amphipoda: Crustacea). *Zootaxa* 3918: 559-570.
- Hurley, D. E. 1954. Studies on the New Zealand amphipodan fauna. No. 5. *Pleonexes lessoniae*, a new species of the family Ampithoidae. *Transactions of the Royal Society of New Zealand* 81: 619-626.
- ICZN (International Commission on Zoological Nomenclature). 1985. *International Code of Zoological Nomenclature*. 3rd Edition. International Trust for Zoological Nomenclature, London. In association with the British Museum (Natural History).
- Imbach, M. C. 1967. Gammaridean Amphipoda from the South China Sea. *Naga Report* 4: 39-167.
- Just, J. 1977. *Amphyllodomus incurvaria* gen. et sp. n. (Crustacea, Amphipoda), a remarkable leaf-cutting amphipod from the marine shallows of Barbados. *Zoologica Scripta* 6: 229-332.
- . 2000. Two new species of *Exampithoe* Barnard, 1925, subgenus *Melanesius* Ledoyer, 1984, from southern Australia (Crustacea: Amphipoda: Ampithoidae). *Records of the Australian Museum* 52: 129-136.
- . 2002. Review of *Pseudopleonexes* Conlan, 1982, with a new species from Australia (Crustacea: Amphipoda: Ampithoidae). *Records of the Australian Museum* 54: 31-40.
- Karaman, G. S. 1975. Contribution to the knowledge of the Amphipoda. *Ampithoe helleri* n.sp., a new name for *Ampithoe bicuspis* Heller 1866. *Glasnik Republičkog Zavoda Za Zaštitu Prirode* (Podgorica, Montenegro) 8: 39-41.
- Kensley, B. 1971. Amphipoda from southern Angola. *Annals of the South African Museum* 57: 149-156.
- Kim, H. S., and C. B. Kim. 1988. Marine gammaridean Amphipoda (Crustacea) of the family Ampithoidae from Korea. *The Korean Journal of Systematic Zoology* 2: 107-134.
- Kim, W., and C. B. Kim. 1991. The marine amphipod crustaceans of Ulreung Island, Korea: part 1. *Korean Journal of Zoology* 34: 232-252.
- Kim, Y. H., S.-S. Hong, K. E. Conlan, and K.-S. Lee. 2012. The genus *Peramphithoe* Conlan and Bousfield, 1982 from Korean waters (Crustacea: Amphipoda: Ampithoidae). *Zootaxa* 3400: 1-19.
- Kossmann, R. 1880. Malacostraca. *Zoologische Ergebnisse Aufträge. Königlichen Academie Wissenschaften Berlin Reise Küstengebiete Rothen Meeres* 2: 67-140.
- Krapp-Schickel, G. 1968. Über eine Zweite Mediterrane *Ampithoe* (Crustacea – Amphipoda). *Memorie del Museo Civico di Storia Naturale, Verona* 15: 337-347.
- . 1978. Die gattung *Ampithoe* (Crustacea; Amphipoda) in Mittelmeer. *Bijdragen Tot de Dierkunde* 48: 1-15.
- Krøyer, H. 1842. Nye nordiske slægter og arter af amphipodernes orden, henholdende til familien Gammarina. (Forelobigt uddrag af et større arbejde). *Naturhistorisk Tidsskrift* 4: 141-166.
- . 1845. Atlas Voyages de la Commission Scientifique du Nord, en Scandinavie, en Laponie, au Spitzberg et aux Fero. Pendant les Années 1838-1840 sur la Corvette la Recherche, commandée par M. Fabvre Lieutenant de vaisseau. Crustacea. Arthus Bertrand, Paris.
- Kunkel, B. W. 1910. The Amphipoda of Bermuda. *Transactions of the Connecticut Academy of Arts and Sciences* 16: 1-116.
- Leach, W. E. 1814. Crustaceology. *The Edinburgh Encyclopaedia* 7: 402-403, 429-430.
- Ledoyer, M. 1967. Amphipodes gammariens des herbiers de phanérogames marines de la région de Tuléar (République Malgache). Étude systématique et écologique. *Annales de la Faculté des Sciences de l'Université de Madagascar* 5: 121-170.
- . 1978. Amphipodes gammariens (Crustacea) des biotopes cavitaires organogènes récifaux de l'île Maurice (Océan Indien). *Mauritius Institute Bulletin* 8: 197-332.
- . 1979. Les gammariens de la pente externe du Grand Récif de Tuléar (Madagascar) (Crustacea Amphipoda). *Memorie del Museo Civico di Storia Naturale di Verona series 2, Sezione Scienze della Vita* 2: 1-150.
- . 1984. Les gammariens (Crustacea, Amphipoda) des herbiers de phanérogames marines de Nouvelle Calédonie (région de Nouméa). *Mémoires du Museum national d'Histoire naturelle (Paris) (4ème séries)* 1: 137-181.
- Lincoln, R. J. 1976. A new species of *Ampithoe* (Pleonexes) (Amphipoda: Ampithoidae) from the north-east Atlantic with a redescription of *A. (P.) gammaroides* (Bate). *Bulletin of the British Museum (Natural History) (Zoology)* 30: 229-241.
- . 1979. British Marine Amphipoda: Gammaridea. *British Museum (Natural History)* 818. *Pisces Conservation Ltd.*
- Lowry, J. K., and A. A. Myers. 2013. A phylogeny and classification of the Senticaudata subord. nov. (Crustacea: Amphipoda). *Zootaxa* 3610(1): 1-80.
- Lyla, P. S., S. Velvizhi, and S. Ajmal Khan. 1998. Brackish water amphipods of the Parangipettai coast. *Centre of Advanced Study in Marine Biology, Annamalai University, Parangipettai, India.*
- Maccagno, T. P. 1936. Crostacei di Assab decapodi stomatopodi anfipodi, Spedizione del Barone Raimondo Franchetti in Dancalia (1928-1929). *Annali del Museo Civico di Storia Naturale (Genova)* 59: 171-186.
- Maddison, W. P., and D. R. Maddison. 2015. Mesquite: a modular system for evolutionary analysis. Version 3.04.
- Mateus, E., and O. Afonso. 1974. Étude d'une collection d'amphipodes des Açores avec la description d'une nouvelle espèce. *Publicações do Instituto de Zoologia «Dr. Augusto Nobre», Porto* 126: 9-39.
- Mateus, A., and E. Mateus. 1986. Campagne de la 'Calypso' dans le Golfe de Guinée et aux Iles Principe, Sao Tome et Annobon (1976). Amphipodes récoltés abord de la Calypso. *Anais Facultad de Ciencias Porto* 66: 125-133.
- , and ———. 1991. Campagne de la Calypso aux Iles de Cap Vert pendant l'année 1959. Amphipodes récoltés abord de la Calypso. *Anais da Faculdade de Ciências do Porto* 67: 37-94.
- Milne Edwards, H. 1830. Extrait de recherches pour servir à l'histoire naturelle des crustacés amphipodes. *Annales des Sciences Naturelles* 20: 353-399.



- Milne, R., and C. L. Griffiths. 2013. Additions to and revisions of the amphipod (Crustacea: Amphipoda) fauna of South Africa, with a list of currently known species from the region. *African Natural History* 9: 61-90.
- Montagu, G. 1808. Description of several marine animals found on the south coast of Devonshire. *Transactions of the Linnean Society of London* 9: 81-114.
- Myers, A. A. 1974. *Amphitholina cuniculus* (Stebbing), a little known marine amphipod crustacean new to Ireland. *Proceedings of the Royal Irish Academy* 74: 463-469.
- . 1985. Shallow-water, coral reef and mangrove Amphipoda (Gammaridea) of Fiji. *Records of the Australian Museum, Supplement* 5: 1-143.
- . 2012. Amphipoda (Crustacea) from Palau, Micronesia: families Ampeliscidae, Amphithoidae, Aoridae, Colomastigidae and Cyproideidae. *ZooKeys* 193: 1-25.
- , and J. K. Lowry. 2003. A phylogeny and a new classification of the Corophiidea Leach, 1814 (Amphipoda). *Journal of Crustacean Biology* 23: 443-485.
- Ng, P. K. L. 1994. The citation of species names and the role of the author's name. *Raffles Bulletin of Zoology* 42: 509-513.
- Oliveira, P. H. 1953. Crustacea Amphipode do Rio de Janeiro. *Memorias do Instituto Oswaldo Cruz* 51: 289-376.
- Ortiz, M. 1976. Un nuevo género y una nueva especie de anfípodo de aguas Cubanas (Amphipoda, Gammaridea, Amphithoidae). *Investigaciones Marinas – Ciencias* 8: 3-12.
- , and R. Lemaitre. 1997. Seven new amphipods (Crustacea: Peracarida: Gammaridea) from the Caribbean coast of South America. *Boletín de Investigaciones Marinas y Costeras – INVEMAR* 26: 71-104.
- , and I. Winfield. 2015. A new amphipod species (Peracarida: Amphipoda: Amphithoidae) collected from Cenote Aerolito, Cozumel Island, Quintana Roo. *Revista Mexicana de Biodiversidad* 86: 332-336.
- Özaydinli, M., and C. O. Coleman. 2012. *Ampithoe bizseli* n. sp. (Crustacea, Amphipoda) from the west coast of Turkey. *Zootaxa* 3388: 17-28.
- Peart, R. A. 2002. New species of Amphithoidae (Crustacea, Amphipoda, Corophiidea) from the eastern Andaman Sea. *Phuket Marine Biological Center Special Publication* 23(1): 229-252.
- . 2004. A revision of the *Cymadusa filosa* complex (Crustacea: Amphipoda: Corophiidea: Amphithoidae). *Journal of Natural History* 38: 301-336.
- . 2006. A revision of *Pseudopleonexes* Conlan, 1982 (Crustacea: Amphipoda: Amphithoidae) with description of three new species from Australia. *Zootaxa* 1344: 1-22.
- . 2007a. A review of the Australian species of *Ampithoe* Leach, 1814 (Crustacea: Amphipoda: Amphithoidae) with descriptions of seventeen new species. *Zootaxa* 1566: 1-95.
- . 2007b. A review of Australian *Cymadusa* (Crustacea: Amphipoda: Amphithoidae) with descriptions of eight new species. *Zootaxa* 1540: 1-53.
- . 2014. Two new genera and four new species of amphithoids (Amphipoda: Amphithoidae) from southern Australian waters. *Journal of Crustacean Biology* 34: 886-907.
- , and L. E. Hughes. 2014. Amphithoid amphipods from the south Pacific: Papua New Guinea; French Polynesia and New Caledonia. *Journal of Natural History* 48: 739-861.
- Poore, A. G. B., and J. K. Lowry. 1997. New amphithoid amphipods from Port Jackson, New South Wales, Australia (Crustacea: Amphipoda: Amphithoidae). *Invertebrate Taxonomy* 11: 897-941.
- , N. A. Hill, and E. E. Sotka. 2008. Phylogenetic and geographic variation in host breadth and composition by herbivorous amphipods in the family Amphithoidae. *Evolution* 62: 21-38.
- , and P. D. Steinberg. 1999. Preference-performance relationships and effects of host plant choice in an herbivorous marine amphipod. *Ecological Monographs* 69: 443-464.
- Rabindranath, P. 1972. Marine Gammaridea (Crustacea: Amphipoda) from the Indian region. *Family Amphithoidae. Marine Biology* 14: 161-178.
- Reid, D. M. 1951. Report on the Amphipoda (Gammaridea and Caprelliidea) of the coast of tropical West Africa. *Atlantide Report* 2: 189-291.
- Ren, X. 2001. Gammaridean shrimps from the family Amphithoidae (Crustacea: Amphipoda) from Hainan Island, South China Sea, pp. 65-74. In, *Marine Fauna of the Shallow Waters around Hainan Island, South China Sea. National Science Museum Monographs (Tokyo)* 21.
- Ruffo, S. 1953. Studi sui crostacei anfipodi XXXVI. Nota critica su *Biancolina algicola* D. Val. (Amphipoda Prophiantidae). *Atti dell'Accademia di Agricoltura Scienze e Lettere di Verona (Series 6)* 3: 1-9.
- . 1954. Studi sui crostacei anfipodi. XL. Nuovi anfipodi raccolti nel Venezuela dal dott G. Marcuzzi. *Memoria Museo Civico di Storia Naturale di Verona* 4: 117-125.
- . 1969. Terzo contributo alla conoscenza degli anfipodi del Mar Rosso. *Memorie del Museo Civico di Storia Naturale, Verona* 17: 1-77.
- Savigny, J.-C. 1816. Observations generales sur la bouche des arachnides, des crustacés et des entomostraces. *Mémoire sur les Animaux sans Vertèbres. Seconde Mémoire* 1: 39-117.
- Schellenberg, A. 1925. Crustacea Viii: Amphipoda, pp. 111-204. In, W. Michaelsen (ed.), *Beiträge zur Kenntnis der Meeresfauna Westafrika* 3.
- . 1938. Litorale Amphipoden des tropischen Pazifks. *Kunglia Svenska Vetenskapsakademiens Handlingar* 16: 1-105.
- Sheard, K. 1936. Amphipods from a South Australian Reef – part 2. *Transactions and Proceedings of the Royal Society of South Australia* 60: 173-179.
- Shin, M.-H., C. O. Coleman, J. S. Hong, and W. Kim. 2015. A new species of *Peramphithoe* (Amphipoda: Amphithoidae) from South Korea, with morphological diagnoses of the world cogenetic species. *Journal of Crustacean Biology* 35: 255-270.
- Shoemaker, C. R. 1938. Three new species of the amphipod genus *Ampithoe* from the west coast of America. *Journal of the Washington Academy of Sciences* 28: 15-25.
- Sivaprakasam, T. E. 1970. Amphipods of the family Amphithoidae from the Madras Coast. *Journal of the Marine Biological Association of India* 12: 64-80.
- Smith, S. I. 1873. Crustacea ex. Isopoda. Report upon the Invertebrate animals of Vineyard Sound, 1<sup>st</sup> Edition. US. Commission of Fish and Fisheries, Part 1. Report on the condition of the sea fisheries of the south coast of New England in 1871 and 1872, USA.
- Spence Bate, C. 1856. On the British Edriophthalma. Report of the twenty-fifth Meeting of the British Association for the Advancement of Science 1855: 18-62.
- . 1857. A synopsis of the British edriophthalmous Crustacea. *Annals and Magazine of Natural History (Series 2)* 19: 135-152.
- . 1858. On some new genera and species of Crustacea Amphipoda. *Annals and Magazine of Natural History (Series 3)* 1: 361-362.
- . 1862. Catalogue of the Specimens of Amphipodous Crustacea in the Collection of the British Museum. *British Museum of Natural History, London*.
- Stebbing, T. R. R. 1874. On some species of *Ampithoe* and *Sunamphithoe*. *Annals and Magazine of Natural History (Series 4)* 14: 111-118.
- . 1895. Two new amphipods from the West Indies. *Annals and Magazine of Natural History (Series 6)* 15: 397-403.
- . 1899. Revision of Amphipoda. *Annals and Magazine of Natural History (Series 7)* 3: 350.
- Stephensen, K. 1944. Some Japanese amphipods. *Videnskabelige Meddelelser fra Dansk Naturhistorisk Forening* 108: 25-88.
- Stimpson, W. 1864. Descriptions of new species of marine Invertebrata from Puget Sound, collected by the naturalists of the North-West Boundary Commission, A.H. Campbell, esq., commissioner. *Proceedings of the Academy of Natural Sciences, Philadelphia* 16: 153-165.
- Stout, V. R. 1912. Studies in Laguna Amphipoda. *First Annual Report of the Laguna Marine Laboratory* 1: 134-149.
- Swofford, D. L. 2002. PAUP\*. *Phylogenetic Analysis Using Parsimony (\*and Other Methods)*. Version 4. Sinauer Associates, Sunderland, MA.
- Taylor, R. B. 1998. Short-term dynamics of a seaweed epifaunal assemblage. *Journal of Experimental Marine Biology and Ecology* 227: 67-82.
- Templeton, R. 1836. Catalogue of Irish Crustacea, Myriapoda and Arachnoida, selected from the papers of the late John Templeton, Esq. *Annals and Magazine of Natural History (Series 1)* 9: 9-14.
- Vader, W. 1983. Prehensile pereopods in gammaridean Amphipoda. *Sarsia* 68: 139-148.
- von der Brüggen, E. 1907. Zwei neue Amphipoden-Arten aus Wladiwostok. *Annales du Musée Zoologique, Academie Impériale des Sciences de Saint-Petersbourg* 12: 478-483.
- Watling, L. 1993. Functional morphology of the amphipod mandible. *Journal of Natural History* 27: 837-849.

RECEIVED: 16 May 2016.

ACCEPTED: 18 May 2016.

AVAILABLE ONLINE: 4 June 2016.



## Appendix A. Terminal taxa used in phylogenetic analysis and sources of character-state scorings.

| Taxon                                                             | Source                                                              |
|-------------------------------------------------------------------|---------------------------------------------------------------------|
| <i>Protomedeia articulata</i> Barnard, 1962                       | J. L. Barnard (1962)                                                |
| <i>Protomedeia stephensoni</i> Hirayama, 1984                     | Hirayama (1984)                                                     |
| <i>Amphithoides longicornis</i> Kossmann, 1880                    | Kossmann (1880)                                                     |
| <i>Amphitholina cuciculus</i> Stebbing, 1874                      | Stebbing (1874), Myers (1974)                                       |
| <i>Ampithoe brevipalma</i> Kim and Kim, 1988                      | Kim and Kim (1988)                                                  |
| <i>Ampithoe caddi</i> Poore and Lowry, 1997                       | Type material (AM P45054-45056)                                     |
| <i>Ampithoe gammaroides</i> Spence Bate, 1857                     | Spence Bate (1857), Chevreux and Fage (1925)                        |
| <i>Ampithoe ngana</i> Poore and Lowry, 1997                       | Type material (AM P45061-45064)                                     |
| <i>Ampithoe rubricata</i> Montagu, 1808                           | Montagu (1808), Bousfield (1973)                                    |
| <i>Ampithoe valida</i> Smith, 1873                                | Smith (1873), Kim and Kim (1988)                                    |
| <i>Austrothoe jimlowryi</i> Peart, 2014                           | Type material (AM P61903-61904)                                     |
| <i>Austrothoe ochos</i> Peart, 2014                               | Type material (WAM C55180; SAMA C7887)                              |
| <i>Cymadusa botulus</i> Hughes and Peart, 2013                    | Type material (WAM C52210-52211)                                    |
| <i>Cymadusa brevidactyla</i> Chevreux, 1907                       | Chevreux (1907, 1908)                                               |
| <i>Cymadusa euclidius</i> Hughes and Peart, 2013                  | Type material (NMV J64939)                                          |
| <i>Cymadusa filosa</i> Savigny, 1816                              | Type material (MVR-Cr.)                                             |
| <i>Cymadusa uncinata</i> Stout, 1912                              | Stout (1912)                                                        |
| <i>Cymadusa munnu</i> Poore and Lowry, 1997                       | Type material (AM P45081-45085)                                     |
| <i>Cymadusa crassicornis</i> Costa, 1857                          | Costa (1857), Chevreux and Fage (1925)                              |
| <i>Exampithoe gracilipes</i> Ledoyer, 1984                        | Ledoyer (1984)                                                      |
| <i>Exampithoe natalensis</i> K. H. Barnard, 1925                  | K. H. Barnard (1925)                                                |
| <i>Macropisthopous stebbingi</i> K. H. Barnard, 1916              | Type material, holotype and slide (SAMC 18971, A2917, A3287, A3035) |
| <i>Melanesius kutti</i> Poore and Lowry, 1997                     | Type material (AM P45087-45090)                                     |
| <i>Melanesius halei</i> Just, 2000                                | Just (2000)                                                         |
| <i>Melanesius cooki</i> Ledoyer, 1984                             | Ledoyer (1984)                                                      |
| <i>Melanesius latibasis</i> Appadoo and Myers, 2004               | Appadoo and Myers (2004)                                            |
| <i>Paradusa bilobata</i> Ruffo, 1969                              | Ruffo (1969)                                                        |
| <i>Paradusa mauritiensis</i> Ledoyer, 1978                        | Ledoyer (1978)                                                      |
| <i>Paranexes gallaharae</i> Peart, 2014                           | Type material (WAM C55181-55183, AM P.62555)                        |
| <i>Paranexes yallingup</i> Peart, 2014                            | Type material (AM P.51274-51276)                                    |
| <i>Paragrubia dongara</i> Hughes and Peart, 2013                  | Type material (WAM C52215-52216)                                    |
| <i>Paragrubia dwyeri</i> Hughes and Peart, 2013                   | Type material (AM P.90117, P.81800)                                 |
| <i>Paragrubia springthorpei</i> Hughes and Peart, 2013            | Type material (WAM C52217-52218)                                    |
| <i>Paragrubia variata</i> (Sheard, 1936)                          | Sheard (1936)                                                       |
| <i>Paragrubia vorax</i> Chevreux, 1901                            | Chevreux (1901)                                                     |
| <i>Peramphithoe baegryeongensis</i> Kim and Kim, 1988             | Kim and Kim (1988)                                                  |
| <i>Peramphithoe femorata</i> (Krøyer, 1845)                       | Krøyer (1845), Conlan and Bousfield (1982)                          |
| <i>Peramphithoe guryongensis</i> Shin, Colman, Hong and Kim, 2015 | Shin et al. (2015)                                                  |
| <i>Peramphithoe parmerong</i> (Poore and Lowry, 1997)             | Type material (AM P50767-50770, AM P45092)                          |
| <i>Peramphithoe humeralis</i> Stimpson, 1864                      | Stimpson (1864), Conlan and Bousfield (1982)                        |
| <i>Peramphithoe namhaensis</i> Kim and Kim, 1988                  | Kim and Kim (1988)                                                  |
| <i>Plumithoe bouleri</i> Peart and Hughes (2014)                  | Peart and Hughes (2014)                                             |
| <i>Plumithoe acuticoxa</i> Myers, 2012                            | Myers (2012)                                                        |
| <i>Plumithoe lata</i> Myers, 2012                                 | Myers (2012)                                                        |
| <i>Plumithoe madagascariensis</i> Myers, 2012                     | Myers (2012)                                                        |
| <i>Plumithoe quadrimana</i> (Haswell, 1879)                       | Haswell (1879), Poore and Lowry (1997), Hughes and Peart (2013)     |
| <i>Pseudoamphithoides bacescui</i> Ortiz, 1976                    | Ortiz (1976)                                                        |
| <i>Pseudopleonexes lessoniae</i> Hurley, 1954                     | Hurley (1954)                                                       |
| <i>Pseudopleonexes sheardi</i> Just, 2002                         | Just (2002)                                                         |
| <i>Sunamphitoe graxon</i> Freewater and Lowry, 1994               | Freewater and Lowry (1994)                                          |
| <i>Sunamphitoe kanaka</i> Peart and Hughes, 2014                  | Peart and Hughes (2014)                                             |
| <i>Sunamphitoe pelagica</i> H. Milne Edwards, 1830                | H. Milne Edwards (1830), Chevreux and Fage (1925)                   |
| <i>Sunamphitoe plumosa</i> Stephensen, 1944                       | Stephensen (1944), Kim and Kim (1988)                               |

Appendix B. Data matrix. Inapplicables marked (-). Species are listed under the generic combinations used prior to the present study.

|                                     |                                                                                    |
|-------------------------------------|------------------------------------------------------------------------------------|
| <i>Protomeleia articulata</i>       | 12151311211111121131334411131312243123221213123122524133331311331132332231321      |
| <i>Protomeleia stephensi</i>        | 12151311211111121131232411231312243123221213123121124131441413441132332241311      |
| <i>Amphithoides longicornis</i>     | 1213131111231222114112111213112224321322121312312152413334131344123222221321       |
| <i>Amphitholina cuniculus</i>       | 32211334-11321322113324412311122412221222121121223321141311142111211221241         |
| <i>Ampithoe brevipalma</i>          | 1221131121231223214122441222112224112221221112112152412134141442441212141131       |
| <i>Ampithoe caddi</i>               | 1221131121231223111122341212111224221222211121121224223341411441141211241131       |
| <i>Ampithoe gammaroides</i>         | 11212311212312232141224212221122231211213212122121123313311311322131211221231      |
| <i>Ampithoe ngana</i>               | 1321231121231223111112341212111224221222211121121224223341313231141311241131       |
| <i>Ampithoe rubricata</i>           | 12212311212312231111234412121112212212221213123121324121441311341141112131131      |
| <i>Ampithoe valida</i>              | 13212311212312231142234412221122241122221213123121524321441413331241212131131      |
| <i>Austrothoe jimlowryi</i>         | 111212112123121211222412221113242212113213113111222321231312222111212222112        |
| <i>Austrothoe ochos</i>             | 1312121121231212112244122211122432121132211111122422323131323211121222112          |
| <i>Cymadusa botulus</i>             | 12142311212312231141131412221422211222221213123122224133231313442431112231131      |
| <i>Cymadusa brevidactyla</i>        | 12121311212312231142141112221412211221221213123121224333441313441241212141111      |
| <i>Cymadusa euclidius</i>           | 1214131121231223111122141222111223212221213123122224333431311331141211141111       |
| <i>Cymadusa filosa</i>              | 12131111212312231141142412221411242212221213123122224233441413441341212131111      |
| <i>Cymadusa uncinata</i>            | 12141311212312232141232412221112211321221213123122224233441313442431112241131      |
| <i>Cymadusa munnu</i>               | 12131311212312231111233412221112242312211213123121124333441411441141311141111      |
| <i>Cymadusa crassicornis</i>        | 12131311212312232131241112221412211221221213123121124233441313441331112131111      |
| <i>Exampithoe gracilipes</i>        | 13211322-111112211124141222211214421211211121121124123321313332111212221111        |
| <i>Exampithoe natalensis</i>        | 1321232111111122111134312222112134212111113123121124121231311222231311221131       |
| <i>Macropisthopous stebbingi</i>    | 1221111111221222231325141232313112413112211121321121123231213332131311221331       |
| <i>Melanesius kutti</i>             | 13211324-111212121122241222111224222211321222121224121331313322111311221131        |
| <i>Melanesius halei</i>             | 13211334-111112225122241222251214221211211121121124223331313322121311221131        |
| <i>Melanesius cooki</i>             | 13211323-111211121122241212211224321211211121121324123221313222121311221111        |
| <i>Melanesius latibasis</i>         | 12211334-111111211231412222113143222112211121122223123221213222121311221131        |
| <i>Paradusa bilobata</i>            | 1312131111231122111122241212112324221222221121121224131221313221131112231131       |
| <i>Paradusa mauritiensis</i>        | 121213111112311221111122412221112242212221223123121224233221211231131112231111     |
| <i>Paranexes gallaharae</i>         | 1221231121231222211132221222111223221211312212212112432322131313131211231231       |
| <i>Paranexes yallingup</i>          | 12212311212312232111324312221112222212113122122121124323111311121131211231231      |
| <i>Paragrubia dongara</i>           | 12151311112212211111331412121113243212221213123122524133441313441342122141111      |
| <i>Paragrubia dwyeri</i>            | 12151311112212211112222112121112242212221213123122524133431213341232222141111      |
| <i>Paragrubia springthorpei</i>     | 12151311112212211111222112121112243212221213123122524133441313341242222141111      |
| <i>Paragrubia variata</i>           | 1215131111221222211122412122412212222221213123121223131331212331232222131111       |
| <i>Paragrubia vorax</i>             | 12141311112212221111222112121112212212221213123122524133441313331132222141111      |
| <i>Peramphithoe baegryeongensis</i> | 12211311112211232241222422231112211312112211121121124333341313442241312221131      |
| <i>Peramphithoe femorata</i>        | 12212311212312232241222422231412211322111213123121224133441313442131211131131      |
| <i>Peramphithoe guryongensis</i>    | 12211311212212232241232422231412241322112233223121124333341313442131311231131      |
| <i>Peramphithoe parmerong</i>       | 12211311212212232241232422231412211312111233223221324133341313342131311231131      |
| <i>Peramphithoe humeralis</i>       | 12212311212212232231231442232312243413111213123121124133441413442111212221131      |
| <i>Peramphithoe namhaensis</i>      | 12211311212212232241231422231412211322111213123121224333441313442231211231131      |
| <i>Plumithoe bouleri</i>            | 12211111112312232111222112221412242212212211121121223333221323221132212131131      |
| <i>Plumithoe acuticoxa</i>          | 12211111112312232141224112231512241322212211121121223233121223211122212221131      |
| <i>Plumithoe lata</i>               | 12211111112312232111224112221412211222211113123122223333111223211112212231131      |
| <i>Plumithoe madagascariensis</i>   | 122111111123122321412241222111224232221213123121223131221223211132212231131        |
| <i>Plumithoe quadrimanus</i>        | 12211111112312232141224122214122122122122111211212242333221323211132212131111      |
| <i>Pseudoamphithoides basceui</i>   | 132113111223222222312354122223122432122211121122214323131313331112122211331        |
| <i>Pseudopleonexes lessoniae</i>    | 22212311122222132241225422231112242212113222122121214221132412132111311211241      |
| <i>Pseudopleonexes sheardi</i>      | 23212311122222132231322122221112242212113222122121211122122312122111311211221      |
| <i>Sunamphitoe graxon</i>           | 12212314-2211232241222422131312241312112221121121124133241313242141311131131       |
| <i>Sunamphitoe kanaka</i>           | 12211314-2211232241232422231412241322112221121121324333331313442131311231131       |
| <i>Sunamphitoe pelagica</i>         | 12211314-2211232241222122231312211322122212112122312221211212212231212211131121131 |
| <i>Sunamphitoe plumosa</i>          | 12211214-2211232251222422231512211312111211121122224133241313341131312131131       |

Appendix C. Unambiguous character state changes for 1 of 5 most parsimonious topologies shown in Fig. 2. Clade numbers correspond to those indicated in Fig. 2.

| Clade no. | Character state changes                                                                    |
|-----------|--------------------------------------------------------------------------------------------|
| 1         | 11:1→2, 12:1→3, 14:1→2, 15:1→2, 26:1→2, 30:3→1, 36:1→2, 37:2→1, 69:3→2, 70:3→2             |
| 2         | 28:3→2, 38:3→2, 67:3→4, 72:2→1, 75:3→1                                                     |
| 3         | 12:3→2, 50:1→2                                                                             |
| 4         | 23:1→2, 24:4→1, 63:4→3                                                                     |
| 5         | 35:3→2, 67:4→3                                                                             |
| 6         | 16: 1→2, 34:4→1, 64:4→3                                                                    |
| 7         | 27:1→2, 35:3→2, 51:5→2, 68:2→1, 70:2→1                                                     |
| 8         | 22:2/3→4, 30:1→4                                                                           |
| 9         | 34:4→1, 35:2→1, 37:1→2, 38:2→1                                                             |
| 10        | 67:4→3, 69:2→1                                                                             |
| 11        | 4:3→4, 22:4→3, 50:1→2, 65:1→2, 72:1→2, 76:1→3                                              |
| 12        | 62:3→1, 71:2→1                                                                             |
| 13        | 63:4→3                                                                                     |
| 14        | 3:1→2, 23:1→4, 55:3→2, 76:1→3                                                              |
| 15        | 56: 3→1, 71:1→2                                                                            |
| 16        | 19:1→4, 31:1→2, 35:2→1, 36:2→1, 37:1→2, 60:3→4                                             |
| 17        | 41:1→2, 44:3→1, 47:3→1, 72:1→2                                                             |
| 18        | 23:4→3, 27:2→1, 59:3→2                                                                     |
| 19        | 17:1→2, 40:2→1, 64:4→2, 67:4→3                                                             |
| 20        | 24:4→2, 34:4→3, 41:2→3, 44:1→2, 47:1→2, 51:2→1, 58:4→1, 75:1→2                             |
| 21        | 21:2→3, 39:2→1, 42:2→1, 43:1→2                                                             |
| 22        | 9:2→1, 23:4→2, 62:1→3                                                                      |
| 23        | 55:2→3, 58:4→2, 71:1→2                                                                     |
| 24        | 6:3→1, 24:4→1, 30:1→4, 61:1→2, 68:1→2                                                      |
| 25        | 19:1→4, 23:2→4, 64:2→1                                                                     |
| 26        | 37:1→2, 60:3→2                                                                             |
| 27        | 41:2→1, 44:1→3, 46:1→3                                                                     |
| 28        | 3:2→1, 4:1→2, 14:2→1, 16:3→2, 17:2→1, 40:1→2, 69:2→1                                       |
| 29        | 18:1→2, 39:2→1, 65:1→2, 69:2→3                                                             |
| 30        | 16:3→2, 58:4→3                                                                             |
| 31        | 19:1→3, 23:2→5, 30:1→3, 63:2→3, 64:2→3, 75:1→3                                             |
| 32        | 15:2→1, 17:2→1                                                                             |
| 33        | 3:2→1, 4:1→2, 6:3→2, 9:1→2, 41:2→3, 46:2→1, 49:2→1, 69:2→1, 71:1→2, 74:1→2, 76:3→1, 77:1→2 |
| 34        | 7:1→2, 8:1→4, 11:2→1, 12:3→1, 54:3→1                                                       |
| 35        | 16:2→1, 35:2→3, 58:3→2, 67:1→2                                                             |
| 36        | 57:2→3, 63:2→3                                                                             |
| 37        | 14:2→1, 17:1→2, 33:2→1, 42:2→1, 51:2→1                                                     |
| 38        | 18:2→1, 35:2→4                                                                             |
| 39        | 12:3→2, 25:1→2, 28:2→3                                                                     |
| 40        | 14:2→1, 34:4→1, 36:2→3, 55:2→3                                                             |
| 41        | 8:1→4, 30:1→3, 54:3→1                                                                      |
| 42        | 72:2→1, 73:2→3                                                                             |
| 43        | 57:2→3, 63:2→4                                                                             |
| 44        | 22:2→3, 30:1→4, 37:1→2, 73:2→3                                                             |
| 45        | 14:1→2, 44:1→3, 47:1→3                                                                     |
| 46        | 45:1→2                                                                                     |
| 47        | 57:3→4, 69:3→2                                                                             |
| 48        | 5:1→2, 54:3→1                                                                              |
| 49        | 15:2→1, 56:3→1, 57:2→1, 63:2→1, 75:1→2, 76:3→4                                             |
| 50        | 5:1→2, 41:2→3, 44:1→2, 47:1→2, 52:2→1, 59:1→2, 73:2→1                                      |
